# Supplementary material for: The Role of Co-Deleted Genes in Neurofibromatosis Type 1 Microdeletions: An Evolutive Approach
Source: PubMed Central journal article supplement (PMC6896060; doi:10.3390/genes10110839), 2019-10-24
Supplement: genes-10-00839-s001.pdf [file genes-10-00839-s001.pdf]

**Table S1.** Clinical characterization of the NF1 patients previously analyzed.

| <b>Patient</b> | <b>Age at onset/gender</b> | <b>Age</b> | <b>Familial</b> | <b>Mutation</b>                   | <b>Riccardi/Ablon</b> | <b>Main symptoms</b>                                                                                                                       | <b>Other pathologies/characteristics</b>                                          |
|----------------|----------------------------|------------|-----------------|-----------------------------------|-----------------------|--------------------------------------------------------------------------------------------------------------------------------------------|-----------------------------------------------------------------------------------|
| 1              | At birth/female            | 26         | No              | Type I <i>NF1</i> microdeletion   | 4/moderate            | CALM, cutaneous and malignant peripheral nerve sheath tumour, axillary and inguinal freckling, Lisch nodules, scoliosis, cognitive deficit | No                                                                                |
| 2              | 4 years/male               | 57         | Yes             | Atypical <i>NF1</i> microdeletion | 2/moderate            | CALM, cutaneous neurofibromas, axillary and inguinal freckling                                                                             | Hemochromatosis, hypogonadism                                                     |
| 3              | 4 years/male               | 46         | Yes             | Atypical <i>NF1</i> microdeletion | 2/mild                | CALM, cutaneous and plexiform neurofibromas, axillary and inguinal freckling, macrocephaly                                                 | No                                                                                |
| 4              | 4 years/male               | 14         | No              | Atypical <i>NF1</i> microdeletion | 2/moderate            | CALM, cutaneous neurofibromas, axillary and inguinal freckling, macrocephaly                                                               | Dysmorphic features, oblique palpebral fissures, protruding ears and tall stature |

CALM = Café-au-lait macules.

**Table S2.** Information about the sequences obtained in the Ensembl and NCBI databases for all species included in this study.

| Specie                                             | Gene             | Protein code       | Locus name         | Gene                      | Number of transcripts | Genomic location     | Score | E-value   | %ID   |
|----------------------------------------------------|------------------|--------------------|--------------------|---------------------------|-----------------------|----------------------|-------|-----------|-------|
| Cattle (Bos taurus - Bta) 60 chromosomes (29+X)    | <i>CRLF3</i>     | ENSBTAP00000024457 | ENSBTAG00000018381 | <i>CRLF3</i>              | 1                     | 19:18456446-18498690 | 642   | 0.0       | 95.66 |
|                                                    | <i>ATAD5</i>     | ENSBTAP00000024464 | ENSBTAG00000018383 | <i>ATAD5</i>              | 1                     | 19:18411252-18445391 | 1955  | 0.0       | 76.77 |
|                                                    | <i>ADAP2/</i>    | ENSBTAP00000004328 | ENSBTAG00000003334 | <i>ADAP2</i>              | 1                     | 19:18354230-18388232 | 517   | 0.0       | 87.21 |
|                                                    | <i>RNF135</i>    | ENSBTAP00000022890 | ENSBTAG00000017225 | <i>RNF135</i>             | 1                     | 19:18331445-18343178 | 412   | 1,00E-153 | 64.60 |
|                                                    | <i>NF1</i>       | ENSBTAP00000015699 | ENSBTAG00000011829 | <i>NF1</i>                | 2                     | 19:18973027-19183670 | 4131  | 0.0       | 97.17 |
|                                                    | <i>UTP6</i>      | ENSBTAP00000020740 | ENSBTAG00000015612 | <i>UTP6</i>               | 1                     | 19:18570929-18596526 | 703   | 0.0       | 74.75 |
|                                                    | <i>SUZ12</i>     | ENSBTAP00000024971 | ENSBTAG00000018752 | <i>SUZ12</i>              | 1                     | 19:18507875-18544756 | 1031  | 0.0       | 99.24 |
|                                                    | <i>OMG</i>       | ENSBTAP00000035220 | ENSBTAG00000025213 | <i>OMG</i>                | 1                     | 19:19045123-19046406 | 571   | 0.0       | 95.09 |
|                                                    | <i>LRRC37B</i>   | ENSBTAP00000004849 | ENSBTAG00000027274 | <i>ENSBTAG00000027274</i> | 2                     | 19:45804030-45845485 | 424   | 7,00E-147 | 42.35 |
|                                                    | <i>EVI2A</i>     | ENSBTAP00000012311 | ENSBTAG00000009354 | <i>EVI2A</i>              | 1                     | 19:19023409-19024104 | 279   | 1,00E-101 | 79.74 |
|                                                    | <i>EVI2B</i>     | ENSBTAP00000012309 | ENSBTAG00000009353 | <i>EVI2B</i>              | 1                     | 19:19034875-19036206 | 407   | 2,00E-151 | 67.19 |
|                                                    | <i>RAB11FIP4</i> | ENSBTAP00000022573 | ENSBTAG00000016972 | <i>RAB11FIP4</i>          | 1                     | 19:18851512-18886471 | 673   | 0.0       | 94.11 |
|                                                    | <i>TEFM</i>      | ENSBTAP00000024467 | ENSBTAG00000018386 | <i>C19H17orf42</i>        | 1                     | 19:18400772-18407786 | 420   | 1,00E-157 | 76.55 |
|                                                    | <i>COPRS</i>     | ENSBTAP00000002453 | ENSBTAG00000001885 | <i>COPRS</i>              | 1                     | 19:18604745-18608931 | 219   | 8,00E-78  | 76.88 |
| Marmoset (Callithrix jacchus - Cja) 48 chromosomes | <i>CRLF3</i>     | ENSCJAP00000026067 | ENSCJAG00000014163 | <i>CRLF3</i>              | 3                     | 5:92519493-92566475  | 653   | 0.0       | 98.19 |
|                                                    | <i>ATAD5</i>     | ENSCJAP00000026098 | ENSCJAG00000014179 | <i>ATAD5</i>              | 1                     | 5:92433480-92513351  | 2253  | 0.0       | 87.82 |
|                                                    | <i>ADAP2</i>     | ENSCJAP00000026172 | ENSCJAG00000014210 | <i>ADAP2</i>              | 1                     | 5:92369119-92406702  | 554   | 0.0       | 93.44 |
|                                                    | <i>RNF135</i>    | ENSCJAP00000026182 | ENSCJAG00000014235 | <i>RNF135</i>             | 3                     | 5:92342252-92357613  | 560   | 0.0       | 85.75 |

|                                                                                                 |                    |                     |                    |                           |                     |                        |           |           |        |
|-------------------------------------------------------------------------------------------------|--------------------|---------------------|--------------------|---------------------------|---------------------|------------------------|-----------|-----------|--------|
| (22+X+Y)                                                                                        | <i>NF1</i>         | ENSCJAP00000025805  | ENSCJAG00000013924 | <i>NF1</i>                | 6                   | 5:93187983-93481033    | 4293      | 0.0       | 99.68  |
|                                                                                                 | <i>UTP6</i>        | ENSCJAP00000025966  | ENSCJAG00000014115 | <i>UTP6</i>               | 1                   | 5:92698514-92738377    | 866       | 0.0       | 95.64  |
|                                                                                                 | <i>SUZ12</i>       | ENSCJAP00000026016  | ENSCJAG00000014133 | <i>SUZ12</i>              | 1                   | 5:92580829-92648466    | 1035      | 0.0       | 99.39  |
|                                                                                                 | <i>OMG</i>         | ENSCJAP00000025889  | ENSCJAG00000014092 | <i>OMG</i>                | 1                   | 5:93269084-93270367    | 592       | 0.0       | 97.90  |
|                                                                                                 | <i>LRRC37B</i>     | ENSCJAP00000044215  | ENSCJAG0000001032  | <i>ENSCJAG0000001032</i>  | 3                   | GL285097.1:40089-55767 | 541       | 0.0       | 53.95  |
|                                                                                                 |                    | ENSCJAP00000026099  | ENSCJAG00000014194 | <i>ENSCJAG00000014194</i> | 1                   | 13:20088200-20090218   | 259       | 4,00E-86  | 41.26  |
|                                                                                                 |                    | ENSCJAP00000002355  | ENSCJAG0000001338  | <i>ENSCJAG0000001338</i>  | 3                   | 5:63796051-63811610    | 227       | 6,00E-73  | 71.35  |
|                                                                                                 |                    | ENSCJAP000000032794 | ENSCJAG00000017781 | <i>ENSCJAG00000017781</i> | 1                   | 5:38440670-38443673    | 209       | 4,00E-66  | 41.30  |
|                                                                                                 | <i>EVI2A</i>       | ENSCJAP00000025894  | ENSCJAG00000014096 | <i>ENSCJAG00000014096</i> | 1                   | 5:93241274-93243377    | 365       | 3,00E-136 | 91.02  |
|                                                                                                 | <i>EVI2B</i>       | ENSCJAP00000046393  | ENSCJAG00000014095 | <i>EVI2B</i>              | 2                   | 5:93256893-93258209    | 536       | 0.0       | 87.70  |
| <i>RAB11FIP4</i>                                                                                | XP_002748389       | Gene ID: 100393768  | <i>RAB11FIP4</i>   | 2                         | 5:NC_013900.1       | 878                    | 0.0       | 99.00     |        |
| <i>TEFM</i>                                                                                     | ENSCJAP00000026127 | ENSCJAG00000014201  | <i>TEFM</i>        | 1                         | 5:92423632-92429548 | 481                    | 0.0       | 87.64     |        |
| <i>COPRS</i>                                                                                    | XP_008995376       | Gene ID: 100391809  | <i>COPRS</i>       | 3                         | 5:NC_013900.1       | 302                    | 2,00E-104 | 88.00     |        |
| Dog (Canis lupus familiaris - Clu) 78 chromosomes (38+X)                                        | <i>CRLF3</i>       | ENSCAFP00000027303  | ENSCAFG00000018492 | <i>CRLF3</i>              | 1                   | 9:NC_006591.3          | 823       | 0.0       | 96.00  |
|                                                                                                 | <i>ATAD5</i>       | ENSCAFP00000027299  | ENSCAFG00000018481 | <i>ATAD5</i>              | 2                   | 9:40870927-40917915    | 1973      | 0.0       | 76.70  |
|                                                                                                 | <i>ADAP2</i>       | ENSCAFP00000030645  | ENSCAFG00000018466 | <i>ADAP2</i>              | 1                   | 9:40819428-40845115    | 532       | 0.0       | 89.24  |
|                                                                                                 | <i>RNF135</i>      | XP_005624884        | Gene ID: 480614    | <i>RNF135</i>             | 1                   | 9:NC_006591.3          | 535       | 0.0       | 65.00  |
|                                                                                                 | <i>NF1</i>         | ENSCAFP00000027461  | ENSCAFG00000018592 | <i>NF1</i>                | 2                   | 9:41470995-41679382    | 4225      | 0.0       | 98.51  |
|                                                                                                 | <i>UTP6</i>        | ENSCAFP00000027330  | ENSCAFG00000018507 | <i>UTP6</i>               | 1                   | 9:41067262-41093010    | 809       | 0.0       | 89.46  |
|                                                                                                 | <i>SUZ12</i>       | ENSCAFP00000027313  | ENSCAFG00000018498 | <i>SUZ12</i>              | 1                   | 9:40994870-41038250    | 1020      | 0.0       | 99.23  |
|                                                                                                 | <i>OMG</i>         | ENSCAFP00000027481  | ENSCAFG00000018624 | <i>OMG</i>                | 1                   | 9:41546736-41548019    | 583       | 0.0       | 96.26  |
|                                                                                                 | <i>LRRC37B*</i>    | ENSCAFP00000041156  | ENSCAFG00000031375 | <i>ENSCAFG00000031375</i> | 1                   | 9:17979631-17995435    | 286       | 1,00E-93  | 38.47  |
|                                                                                                 |                    | ENSCAFP00000037618  | ENSCAFG00000029478 | <i>ENSCAFG00000029478</i> | 1                   | 9:10291948-10304722    | 246       | 6,00E-75  | 36.31  |
|                                                                                                 |                    | ENSCAFP00000043093  | ENSCAFG00000031467 | <i>ENSCAFG00000031467</i> | 1                   | 14:22322624-22332292   | 158       | 2,00E-44  | 30.58  |
|                                                                                                 | <i>EVI2A</i>       | ENSCAFP00000036800  | ENSCAFG00000029405 | <i>ENSCAFG00000029405</i> | 1                   | 9:41523246-41523938    | 260       | 1,00E-93  | 74.03  |
|                                                                                                 | <i>EVI2B</i>       | ENSCAFP00000027479  | ENSCAFG00000018623 | <i>EVI2B</i>              | 1                   | 9:41535738-41537066    | 447       | 2,00E-167 | 72.52  |
|                                                                                                 | <i>RAB11FIP4</i>   | ENSCAFP00000027341  | ENSCAFG00000018522 | <i>RAB11FIP4</i>          | 1                   | 9:41342258-41416095    | 719       | 0.0       | 94.25  |
| <i>TEFM</i>                                                                                     | ENSCAFP00000042698 | ENSCAFG00000018475  | <i>TEFM</i>        | 2                         | 9:40860963-40867816 | 429                    | 2,00E-161 | 76.11     |        |
| <i>COPRS</i>                                                                                    | ENSCAFP00000027336 | ENSCAFG00000018517  | <i>COPRS</i>       | 1                         | 9:41100041-41103771 | 192                    | 9,00E-67  | 81.62     |        |
| Gorilla (Gorilla gorilla gorilla - Ggo) 46 chromosomes (22+X) chromosomes 2 divided in 2a e 2b) | <i>CRLF3</i>       | XP_004042017        | Gene ID: 101150086 | <i>CRLF3</i>              | 1                   | 5:NC_018429.1          | 878       | 0.0       | 100.00 |
|                                                                                                 | <i>ATAD5</i>       | ENSGGOG00000005765  | ENSGGOG00000005883 | <i>ATAD5</i>              | 1                   | 5:53366215-53428754    | 2363      | 0.0       | 93.71  |
|                                                                                                 | <i>ADAP2</i>       | XP_004042029        | Gene ID: 101126041 | <i>ADAP2</i>              | 2                   | 5:53303421-53338277    | 668       | 0.0       | 89.00  |
|                                                                                                 | <i>RNF135</i>      | XP_004042030        | Gene ID: 101126040 | <i>RNF135</i>             | 1                   | 5:NC_018429.1          | 679       | 0.0       | 98.00  |
|                                                                                                 | <i>NF1</i>         | ENSGGOG00000006859  | ENSGGOG00000006983 | <i>NF1</i>                | 2                   | 5:52834636-53161679    | 4209      | 0.0       | 98.20  |
|                                                                                                 | <i>UTP6</i>        | ENSGGOG00000028108  | ENSGGOG00000026003 | <i>ENSGGOG00000026003</i> | 2                   | 15:30768738-30770828   | 671       | 0.0       | 78.76  |
| ENSGGOG00000013242                                                                              |                    | ENSGGOG00000013569  | <i>UTP6</i>        | 1                         | 5:52298783-52338080 | 611                    | 0.0       | 74.20     |        |

|                                                      |                  |                      |                           |                           |                      |                           |           |           |        |
|------------------------------------------------------|------------------|----------------------|---------------------------|---------------------------|----------------------|---------------------------|-----------|-----------|--------|
|                                                      | <i>SUZ12</i>     | ENSGGOP00000010105   | ENSGGOG00000010352        | <i>SUZ12</i>              | 1                    | 5:52191094-52251152       | 920       | 0.0       | 99.66  |
|                                                      | <i>OMG</i>       | ENSGGOP00000046509   | ENSGGOG00000039026        | <i>OMG</i>                | 1                    | CABD030155035.1:2722-4005 | 790       | 0.0       | 98.83  |
|                                                      | <i>LRRC37B</i>   | ENSGGOP00000024608   | ENSGGOG00000012882        | <i>ENSGGOG00000012882</i> | 2                    | 10:30462810-30468162      | 977       | 0.0       | 79.89  |
|                                                      |                  | ENSGGOP00000028210   | ENSGGOG00000026947        | <i>ENSGGOG00000026947</i> | 1                    | 5:52148708-52163228       | 784       | 0.0       | 83.88  |
|                                                      |                  | ENSGGOP00000024093   | ENSGGOG00000025742        | <i>ENSGGOG00000025742</i> | 1                    | 5:53207699-53219434       | 413       | 6,00E-147 | 51.62  |
|                                                      |                  | ENSGGOP00000027053   | ENSGGOG00000024250        | <i>ENSGGOG00000024250</i> | 1                    | 5:45127944-45141094       | 354       | 1,00E-122 | 53.10  |
|                                                      | <i>EVI2A</i>     | ENSGGOP00000025097   | ENSGGOG00000024807        | <i>ENSGGOG00000024807</i> | 2                    | 5:52889964-52892080       | 399       | 9,00E-151 | 98.46  |
|                                                      | <i>EVI2B</i>     | ENSGGOP00000005071   | ENSGGOG00000005182        | <i>EVI2B</i>              | 1                    | 5:52905461-52906765       | 614       | 0.0       | 97.93  |
|                                                      | <i>RAB11FIP4</i> | ENSGGOP00000001056   | ENSGGOG00000001071        | <i>RAB11FIP4</i>          | 1                    | 5:52672926-52816615       | 869       | 0.0       | 99.68  |
|                                                      | <i>TEFM</i>      | ENSGGOP00000020628   | ENSGGOG00000025274        | <i>TEFM</i>               | 1                    | 5:53354081-53361907       | 554       | 0.0       | 99.44  |
|                                                      | <i>COPRS</i>     | ENSGGOP00000007136   | ENSGGOG00000007292        | <i>COPRS</i>              | 2                    | 5:52342244-52349288       | 281       | 4,00E-103 | 97.31  |
| Human (homo sapiens - Hsa) 48 chromosomes (46+X+Y)   | <i>CRLF3</i>     | ENSP000000318804     | ENSG00000176390           | <i>CRLF3</i>              | 1                    | 17:30784190-30824651      | 667       | 0.0       | 100.00 |
|                                                      | <i>ATAD5</i>     | ENSP000000313171     | ENSG00000176208           | <i>ATAD5</i>              | 2                    | 17:30832348-30894910      | 2574      | 0.0       | 100.00 |
|                                                      | <i>ADAP2</i>     | ENSP000000329468     | ENSG00000184060           | <i>ADAP2</i>              | 6                    | 17:30922015-30957866      | 591       | 0.0       | 100.00 |
|                                                      | <i>RNF135</i>    | ENSP000000328340     | ENSG00000181481           | <i>RNF135</i>             | 5                    | 17:30971074-30999188      | 655       | 0.0       | 100.00 |
|                                                      | <i>NF1</i>       | ENSP000000351015     | ENSG00000196712           | <i>NF1</i>                | 7                    | 17:31095310-31374152      | 4302      | 0.0       | 100.00 |
|                                                      | <i>UTP6</i>      | ENSP000000261708     | ENSG00000108651           | <i>UTP6</i>               | 1                    | 17:31863362-31901627      | 908       | 0.0       | 100.00 |
|                                                      | <i>SUZ12</i>     | ENSP000000316578     | ENSG00000178691           | <i>SUZ12</i>              | 2                    | 17:31937448-31998958      | 1040      | 0.0       | 100.00 |
|                                                      | <i>OMG</i>       | ENSP000000247271     | ENSG00000126861           | <i>OMG</i>                | 1                    | 17:31295048-31296331      | 609       | 0.0       | 100.00 |
|                                                      | <i>LRRC37B</i>   | ENSP000000378202     | ENSG00000185158           | <i>LRRC37B</i>            | 9                    | 17:32021147-32053325      | 1295      | 0.0       | 100.00 |
|                                                      | <i>EVI2A</i>     | ENSP000000247270     | ENSG00000126860           | <i>EVI2A</i>              | 5                    | 17:31318306-31320431      | 404       | 2,00E-152 | 100.00 |
|                                                      | <i>EVI2B</i>     | ENSP000000462682     | ENSG00000185862           | <i>EVI2B</i>              | 2                    | 17:31304305-31305609      | 625       | 0.0       | 100.00 |
|                                                      | <i>RAB11FIP4</i> | ENSP000000482620     | ENSG00000131242           | <i>RAB11FIP4</i>          | 4                    | 17:31391892-31531729      | 870       | 0.0       | 100.00 |
|                                                      | <i>TEFM</i>      | ENSP000000462963     | ENSG00000172171           | <i>TEFM</i>               | 3                    | 17:30899172-30906198      | 557       | 0.0       | 100.00 |
| <i>COPRS</i>                                         | ENSP000000304327 | ENSG00000172301      | <i>COPRS</i>              | 3                         | 17:31852142-31859199 | 283                       | 9,00E-104 | 98.39     |        |
| Macaque (Macaca mulatta - Mmu) 42 chromosomes (20+X) | <i>CRLF3</i>     | ENSMMUP00000011900   | ENSMMUG00000009069        | <i>CRLF3</i>              | 1                    | 16:27225529-27279056      | 444       | 0.0       | 99.10  |
|                                                      |                  | ENSMMUP00000021240   | ENSMMUG00000016154        | <i>ENSMMUG00000016154</i> | 1                    | 6:96081251-96082594       | 420       | 4,00E-157 | 68.49  |
|                                                      | <i>ATAD5</i>     | ENSMMUP00000050281.1 | ENSMMUG00000040177        | <i>ATAD5</i>              | 1                    | 16:24784775-24786671      | 3204      | 0.0       | 96.27  |
|                                                      | <i>ADAP2</i>     | ENSMMUP00000011908   | ENSMMUG00000009077        | <i>ADAP2</i>              | 1                    | 16:27378497-27417323      | 572       | 0.0       | 96.06  |
|                                                      | <i>RNF135</i>    | XP_014974482         | Gene ID: 713821           | <i>RNF135</i>             | 1                    | 16:NC_027908.1            | 758       | 0.0       | 90.00  |
|                                                      | <i>NF1</i>       | XP_014974491         | Gene ID: 712911           | <i>NF1</i>                | 3                    | 16:NC_027908.1            | 5816      | 0.0       | 99.00  |
|                                                      | <i>UTP6</i>      | ENSMMUP00000026846   | ENSMMUG00000020403        | <i>UTP6</i>               | 2                    | 16:27056346-27097385      | 881       | 0.0       | 97.49  |
|                                                      | <i>SUZ12</i>     | XP_014974503         | Gene ID: 717834           | <i>SUZ12</i>              | 1                    | 16:NC_027908.1            | 1382      | 0.0       | 99.00  |
|                                                      | <i>OMG</i>       | ENSMMUP00000008966   | ENSMMUG00000006824        | <i>OMG</i>                | 1                    | 16:26468665-26469948      | 594       | 0.0       | 98.36  |
|                                                      | <i>LRRC37B</i>   | ENSMMUP00000024288   | ENSMMUG00000018463        | <i>ENSMMUG00000018463</i> | 3                    | 16:56955303-56992180      | 975       | 0.0       | 77.75  |
| ENSMMUP00000015398                                   |                  | ENSMMUG00000011880   | <i>ENSMMUG00000011880</i> | 5                         | 16:57039966-57077828 | 622                       | 0.0       | 79.90     |        |

|                                                              |                    |                    |                    |                    |                          |                            |           |           |        |
|--------------------------------------------------------------|--------------------|--------------------|--------------------|--------------------|--------------------------|----------------------------|-----------|-----------|--------|
|                                                              |                    | ENSMMP0000004409   | ENSMUG0000003308   | ENSMUG0000003308   | 2                        | 16:55751910-55764041       | 288       | 2,00E-97  | 83.33  |
|                                                              |                    | ENSMMP0000004282   | ENSMUG00000011737  | ENSMUG00000011737  | 2                        | 16:54000170-54002322       | 273       | 9,00E-91  | 47.50  |
|                                                              | <i>EVI2A</i>       | ENSMMP00000035028  | ENSMUG00000008604  | ENSMUG00000008604  | 2                        | 16:26495866-26497991       | 387       | 9,00E-146 | 94.98  |
|                                                              | <i>EVI2B</i>       | ENSMMP00000011283  | ENSMUG00000008603  | <i>EVI2B</i>       | 1                        | 16:26481610-26482923       | 566       | 0.0       | 90.64  |
|                                                              | <i>RAB11FIP4</i>   | ENSMMP00000010642  | ENSMUG00000008127  | <i>RAB11FIP4</i>   | 2                        | 16:26609307-26711478       | 760       | 0.0       | 99.46  |
|                                                              | <i>TEFM</i>        | ENSMMP00000011905  | ENSMUG00000009073  | <i>TEFM</i>        | 1                        | 16:27355262-27361704       | 519       | 0.0       | 93.63  |
|                                                              | <i>COPRS</i>       | XP_001112181       | Gene ID: 713293    | <i>COPRS</i>       | 2                        | 16:NC_027908.1             | 338       | 3,00E-118 | 95.00  |
| Mice ( <i>Mus musculus</i> - Mus) 42 chromosomes (19+X+Y)    | <i>CRLF3</i>       | ENSMSP00000060028  | ENSMUG00000017561  | <i>Crlf3</i>       | 3                        | 11:NC_000077.6             | 631       | 0.0       | 92.99  |
|                                                              | <i>ATAD5</i>       | ENSMSP00000103874  | ENSMUG00000017550  | <i>Atad5</i>       | 2                        | 11:80089771-80134368       | 1670      | 0.0       | 67.82  |
|                                                              | <i>ADAP2</i>       | ENSMSP00000021050  | ENSMUG00000020709  | <i>Adap2</i>       | 2                        | 11:80154216-80178415       | 514       | 0.0       | 85.41  |
|                                                              | <i>RNF135</i>      | ENSMSP00000017839  | ENSMUG00000020707  | <i>Rnf135</i>      | 1                        | 11:80183917-80199084       | 369       | 1,00E-135 | 57.70  |
|                                                              | <i>NF1</i>         | ENSMSP00000071289  | ENSMUG00000020716  | <i>Nf1</i>         | 3                        | 11:79340000-79578393       | 4247      | 0.0       | 98.42  |
|                                                              | <i>UTP6</i>        | ENSMSP00000046643  | ENSMUG00000035575  | <i>Utp6</i>        | 2                        | 11:79935958-79962309       | 785       | 0.0       | 86.10  |
|                                                              | <i>SUZ12</i>       | ENSMSP00000017692  | ENSMUG00000017548  | <i>Suz12</i>       | 2                        | 11:79993527-80032145       | 1021      | 0.0       | 97.87  |
|                                                              | <i>OMG</i>         | ENSMSP00000132918  | ENSMUG00000049612  | <i>Omg</i>         | 1                        | 11:79501741-79503021       | 542       | 0.0       | 89.23  |
|                                                              | <i>LRRC37B</i>     | ENSMSP00000129662  | ENSMUG00000034239  | <i>Gm884</i>       | 2                        | 11:103543324-103614303     | 329       | 2,00E-109 | 38.29  |
|                                                              | <i>EVI2A</i>       | ENSMSP00000125936  | ENSMUG00000078771  | <i>Evi2a</i>       | 2                        | 11:79527117-79527782       | 210       | 6,00E-73  | 64.04  |
|                                                              | <i>EVI2B</i>       | ENSMSP00000128569  | ENSMUG00000070354  | <i>Evi2b</i>       | 1                        | 11:79515470-79516747       | 307       | 7,00E-110 | 53.39  |
|                                                              | <i>RAB11FIP4</i>   | ENSMSP00000017783  | ENSMUG00000017639  | <i>Rab11fip4</i>   | 2                        | 11:79591315-79692836       | 793       | 0.0       | 92.64  |
|                                                              | <i>TEFM</i>        | ENSMSP00000059304  | ENSMUG00000046909  | <i>Tefm</i>        | 2                        | 11:80136848-80142077       | 361       | 2,00E-133 | 67.90  |
|                                                              | <i>COPRS</i>       | ENSMSP00000033839  | ENSMUG00000031458  | <i>Coprs</i>       | 1                        | 8:13885035-13890211        | 204       | 1,00E-71  | 75.74  |
| Gibbon ( <i>Nomascus leucogenys</i> - Nle) 38-52 chromosomes | <i>CRLF3</i>       | XP_003279430       | Gene ID: 100599101 | <i>CRLF3</i>       | 1                        | 14: NC_019829.1            | 683       | 0.0       | 100.00 |
|                                                              | <i>ATAD5</i>       | ENSNLEP00000007107 | ENSNLEG00000005853 | <i>ATAD5</i>       | 1                        | GL397459.1:87678-148528    | 2474      | 0.0       | 96.31  |
|                                                              | <i>ADAP2</i>       | XP_012359120       | Gene ID: 100599439 | <i>ADAP2</i>       | 1                        | 14: NC_019829.1            | 655       | 0.0       | 89.00  |
|                                                              | <i>RNF135</i>      | -----              | -----              | -----              | -----                    | -----                      | -         | -         | -      |
|                                                              | <i>NF1</i>         | ENSNLEP00000013316 | ENSNLEG00000010582 | <i>NF1</i>         | 1                        | GL397485.1:116905-400800   | 4277      | 0.0       | 99.08  |
|                                                              | <i>UTP6</i>        | ENSNLEP00000013490 | ENSNLEG00000011009 | <i>UTP6</i>        | 1                        | GL397485.1:907327-950700   | 875       | 0.0       | 97.15  |
|                                                              | <i>SUZ12</i>       | ENSNLEP00000013539 | ENSNLEG00000011117 | <i>SUZ12</i>       | 1                        | GL397485.1:982109-1055613  | 1035      | 0.0       | 99.54  |
|                                                              | <i>OMG</i>         | ENSNLEP00000013331 | ENSNLEG00000010979 | <i>OMG</i>         | 1                        | GL397485.1:322932-324215   | 598       | 0.0       | 98.13  |
|                                                              | <i>LRRC37B</i>     | ENSNLEP00000013553 | ENSNLEG00000011154 | <i>LRRC37B</i>     | 1                        | GL397485.1:1078267-1111947 | 1106      | 0.0       | 85.19  |
|                                                              |                    | ENSNLEP00000005752 | ENSNLEG00000004744 | ENSNLEG00000004744 | 1                        | GL397331.1:9257466-9291479 | 573       | 0.0       | 66.78  |
|                                                              | <i>EVI2A</i>       | ENSNLEP00000013338 | ENSNLEG00000010986 | ENSNLEG00000010986 | 1                        | GL397485.1:346257-348375   | 384       | 2,00E-144 | 94.98  |
|                                                              | <i>EVI2B</i>       | ENSNLEP00000013335 | ENSNLEG00000010983 | <i>EVI2B</i>       | 1                        | GL397485.1:332211-333518   | 598       | 0.0       | 95.18  |
|                                                              | <i>RAB11FIP4</i>   | ENSNLEP00000013346 | ENSNLEG00000010989 | <i>RAB11FIP4</i>   | 2                        | GL397485.1:435495-560387   | 800       | 0.0       | 92.28  |
|                                                              | <i>TEFM</i>        | ENSNLEP00000007111 | ENSNLEG00000005875 | <i>TEFM</i>        | 1                        | GL397459.1:152769-160546   | 536       | 0.0       | 97.20  |
| <i>COPRS</i>                                                 | ENSNLEP00000013362 | ENSNLEG00000011000 | <i>COPRS</i>       | 1                  | GL397485.1:894672-901060 | 273                        | 4,00E-100 | 93.01     |        |

|                                                                                                            |                    |                    |                      |                           |                      |                           |           |           |        |
|------------------------------------------------------------------------------------------------------------|--------------------|--------------------|----------------------|---------------------------|----------------------|---------------------------|-----------|-----------|--------|
| Chimpanzee<br>(Pan troglodytes<br>- Ptr) 48<br>chromosomes<br>(22+X)                                       | <i>CRLF3</i>       | ENSPTRP00000015299 | ENSPTRG00000008963   | <i>CRLF3</i>              | 1                    | 17:26256802-26298711      | 667       | 0.0       | 100.00 |
|                                                                                                            | <i>ATAD5</i>       | ENSPTRP00000015300 | ENSPTRG00000008964   | <i>ATAD5</i>              | 1                    | 17:26180838-26248737      | 2530      | 0.0       | 98.54  |
|                                                                                                            | <i>ADAP2</i>       | ENSPTRP00000015304 | ENSPTRG00000008966   | <i>ADAP2</i>              | 1                    | 17:26116861-26154177      | 588       | 0.0       | 99.21  |
|                                                                                                            | <i>RNF135</i>      | ENSPTRP00000015306 | ENSPTRG00000008967   | <i>RNF135</i>             | 1                    | 17:26079369-26104642      | 640       | 0.0       | 97.25  |
|                                                                                                            | <i>NF1</i>         | ENSPTRP00000015312 | ENSPTRG00000008970   | <i>NF1</i>                | 1                    | 17:25662187-25937192      | 4301      | 0.0       | 99.96  |
|                                                                                                            | <i>UTP6</i>        | ENSPTRP00000015321 | ENSPTRG00000008977   | <i>UTP6</i>               | 1                    | 17:25103021-25138303      | 777       | 0.0       | 99.23  |
|                                                                                                            | <i>SUZ12</i>       | ENSPTRP00000015327 | ENSPTRG00000008980   | <i>SUZ12</i>              | 1                    | 17:25002473-25065788      | 1036      | 0.0       | 99.70  |
|                                                                                                            | <i>OMG</i>         | ENSPTRP00000015314 | ENSPTRG00000008971   | <i>OMG</i>                | 1                    | 17:25736434-25737717      | 609       | 0.0       | 99.77  |
|                                                                                                            | <i>LRRC37B</i>     | ENSPTRP00000015328 | ENSPTRG00000034311   | <i>ENSPTRG00000034311</i> | 1                    | GL392684.1:11678-26241    | 951       | 0.0       | 97.38  |
|                                                                                                            |                    | ENSPTRP00000061088 | ENSPTRG00000041217   | <i>ENSPTRG00000041217</i> | 1                    | 10:27597821-27599852      | 531       | 0.0       | 64.59  |
|                                                                                                            |                    | ENSPTRP00000015329 | ENSPTRG00000009573   | <i>ENSPTRG00000009573</i> | 1                    | GL392695.1:56411-91269    | 450       | 2.00E-158 | 49.09  |
|                                                                                                            |                    | ENSPTRP00000015475 | ENSPTRG00000009256   | <i>ENSPTRG00000009256</i> | 1                    | GL392694.1:45520-54108    | 330       | 2.00E-113 | 39.84  |
|                                                                                                            | <i>EVI2A</i>       | ENSPTRP00000058537 | ENSPTRG00000008973   | <i>ENSPTRG00000008973</i> | 1                    | 17:25713549-25714256      | 368       | 4.00E-138 | 99.58  |
|                                                                                                            | <i>EVI2B</i>       | ENSPTRP00000015315 | ENSPTRG00000008972   | <i>EVI2B</i>              | 2                    | 17:25727151-25728455      | 616       | 0.0       | 98.39  |
|                                                                                                            | <i>RAB11FIP4</i>   | ENSPTRP00000015317 | ENSPTRG00000008974   | <i>RAB11FIP4</i>          | 1                    | 17:25500679-25603032      | 810       | 0.0       | 100.00 |
| <i>TEFM</i>                                                                                                | ENSPTRP00000015302 | ENSPTRG00000008965 | <i>TEFM</i>          | 1                         | 17:26169195-26176581 | 554                       | 0.0       | 99.44     |        |
| <i>COPRS</i>                                                                                               | ENSPTRP00000015319 | ENSPTRG00000008976 | <i>COPRS</i>         | 2                         | 17:25146467-25154027 | 278                       | 4.00E-102 | 95.70     |        |
| Orangutan<br>(Pongo abelii -<br>Pab) 46<br>chromosomes<br>(22+X)<br>chromosome 2<br>divided in 2a e<br>2b) | <i>CRLF3</i>       | ENSPPYP00000009152 | ENSPPYG00000008142   | <i>CRLF3</i>              | 1                    | 17:25574996-25624139      | 667       | 0.0       | 100.00 |
|                                                                                                            | <i>ATAD5</i>       | -----              | -----                | -----                     | -----                | -----                     | -         | -         | -      |
|                                                                                                            | <i>ADAP2</i>       | XP_002827275       | Gene ID: 100442250   | <i>ADAP2</i>              | 1                    | 17:NC_012608.1            | 721       | 0.0       | 98.00  |
|                                                                                                            | <i>RNF135</i>      | ENSPPYP00000009157 | ENSPPYG00000008145   | <i>RNF135</i>             | 1                    | 17:25772856-25796806      | 632       | 0.0       | 96.06  |
|                                                                                                            | <i>NF1</i>         | ENSPPYP00000009159 | ENSPPYG00000008147   | <i>NF1</i>                | 1                    | 17:25942868-26211914      | 4293      | 0.0       | 99.86  |
|                                                                                                            | <i>UTP6</i>        | ENSPPYP00000009166 | ENSPPYG00000008154   | <i>UTP6</i>               | 1                    | 17:26707240-26772847      | 839       | 0.0       | 93.63  |
|                                                                                                            | <i>SUZ12</i>       | XP_002827252       | Gene ID: 100460330   | <i>SUZ12</i>              | 1                    | 17:NC_012608.1            | 649       | 0.0       | 99.51  |
|                                                                                                            | <i>OMG</i>         | ENSPPYP00000009160 | ENSPPYG00000008148   | <i>DKFZP459F1351</i>      | 1                    | 17:26136074-26137357      | 602       | 0.0       | 98.83  |
|                                                                                                            | <i>LRRC37B</i>     | ENSPPYP00000009625 | ENSPPYG00000008570   | <i>ENSPPYG00000008570</i> | 1                    | 17:57868463-57901830      | 1136      | 0.0       | 89.77  |
|                                                                                                            |                    | ENSPPYP00000002526 | ENSPPYG00000002170   | <i>ENSPPYG00000002170</i> | 2                    | 10:28292459-28297460      | 525       | 0.0       | 65.51  |
|                                                                                                            |                    | ENSPPYP00000009158 | ENSPPYG00000008146   | <i>LRRC37B</i>            | 1                    | 17:25886538-25894358      | 330       | 6.00E-115 | 44.50  |
|                                                                                                            |                    | ENSPPYP00000009941 | ENSPPYG00000008863   | <i>ENSPPYG00000008863</i> | 1                    | 17_random:9615248-9621780 | 281       | 1.00E-95  | 42.41  |
|                                                                                                            |                    | ENSPPYP00000009549 | ENSPPYG00000008498   | <i>ENSPPYG00000008498</i> | 1                    | 17:50407501-50414258      | 236       | 1.00E-77  | 41.40  |
|                                                                                                            | <i>EVI2A</i>       | ENSPPYP00000009162 | ENSPPYG00000008150   | <i>ENSPPYG00000008150</i> | 1                    | 17:26159519-26160238      | 369       | 2.00E-138 | 97.92  |
|                                                                                                            | <i>EVI2B</i>       | ENSPPYP00000009161 | ENSPPYG00000008149   | <i>EVI2B</i>              | 1                    | 17:26145574-26146878      | 613       | 0.0       | 97.70  |
| <i>RAB11FIP4</i>                                                                                           | ENSPPYP00000009164 | ENSPPYG00000008152 | <i>RAB11FIP4</i>     | 1                         | 17:26268215-26371054 | 765                       | 0.0       | 99.82     |        |
| <i>TEFM</i>                                                                                                | ENSPPYP00000009154 | ENSPPYG00000008143 | <i>DKFZP459N1318</i> | 1                         | 17:25701008-25708035 | 545                       | 0.0       | 97.78     |        |
| <i>COPRS</i>                                                                                               | ENSPPYP00000009165 | ENSPPYG00000008153 | <i>COPRS</i>         | 1                         | 17:26695971-26702840 | 278                       | 5.00E-102 | 96.24     |        |
| Mouse (Rattus)                                                                                             | <i>CRLF3</i>       | NP_001162083       | Gene ID: 54395       | <i>Crlf3</i>              | 1                    | 10:NC_005109.4            | 819       | 0.0       | 92.00  |

|                                                    |                  |                     |                     |                           |                               |                                        |          |           |       |
|----------------------------------------------------|------------------|---------------------|---------------------|---------------------------|-------------------------------|----------------------------------------|----------|-----------|-------|
| norvegicus - Rno) 44 chromosomes (20+X+Y)          | <i>ATAD5</i>     | ENSRNOP00000028975  | ENSRNOG00000021903  | <i>Atad5</i>              | 1                             | 10:67427438-67473450                   | 1719     | 0.0       | 68.86 |
|                                                    | <i>ADAP2</i>     | ENSRNOP00000053112  | ENSRNOG00000037148  | <i>Adap2</i>              | 1                             | 10:67494984-67526423                   | 468      | 3,00E-177 | 79.21 |
|                                                    | <i>RNF135</i>    | ENSRNOP00000005428  | ENSRNOG00000004093  | <i>Rhot1</i>              | 1                             | 10:67532030-67558748                   | 389      | 5,00E-143 | 59.91 |
|                                                    | <i>NF1</i>       | ENSRNOP00000050393  | ENSRNOG00000013780  | <i>Nfl</i>                | 2                             | 10:66690133-66928166                   | 4212     | 0.0       | 97.81 |
|                                                    | <i>UTP6</i>      | ENSRNOP00000019044  | ENSRNOG00000014209  | <i>Utp6</i>               | 1                             | 10:67257161-67285617                   | 753      | 0.0       | 82.91 |
|                                                    | <i>SUZ12</i>     | XP_008774000        | Gene ID: 688041     | <i>Suz12</i>              | 2                             | 10:NC_005109.4                         | 1172     | 0.0       | 87.00 |
|                                                    | <i>OMG</i>       | ENSRNOP00000018892  | ENSRNOG00000014107  | <i>Omg</i>                | 1                             | 10:66846059-66847339                   | 546      | 0.0       | 89.93 |
|                                                    | <i>LRRC37B</i>   | ENSRNOP00000042316  | ENSRNOG00000042833  | <i>Gm884</i>              | 1                             | 10:91617260-91661555                   | 273      | 4,00E-90  | 65.31 |
|                                                    | <i>EVI2A</i>     | ENSRNOP00000035290  | ENSRNOG00000022764  | <i>Evi2a</i>              | 1                             | 10:66870624-66871286                   | 226      | 5,00E-80  | 67.40 |
|                                                    | <i>EVI2B</i>     | ENSRNOP00000018898  | ENSRNOG00000014125  | <i>Evi2b</i>              | 1                             | 10:66857378-66858598                   | 296      | 6,00E-106 | 52.95 |
|                                                    | <i>RAB11FIP4</i> | ENSRNOP00000018988  | ENSRNOG00000014135  | <i>Rab11fip4</i>          | 1                             | 10:66942482-67047137                   | 802      | 0.0       | 93.12 |
|                                                    | <i>TEFM</i>      | NP_001020797        | Gene ID: 287554     | <i>Tefm</i>               | 2                             | 10:NC_005109.4                         | 496      | 7,00E-175 | 68.00 |
|                                                    | <i>COPRS</i>     | ENSRNOP00000000123  | ENSRNOG00000000111  | <i>Coprs</i>              | 1                             | 16:80826734-80831784                   | 197      | 7,00E-69  | 73.81 |
| Tarsier (Tarsius syrichta - Tsy) 46-80 chromosomes | <i>CRLF3</i>     | ENSTSY00000001673   | ENSTSYG00000001807  | <i>CRLF3</i>              | 1                             | GeneScaffold_6979:1858-14059           | 509      | 0.0       | 82.71 |
|                                                    | <i>ATAD5</i>     | ENSTSY00000009057   | ENSTSYG00000009871  | <i>ATAD5</i>              | 1                             | GeneScaffold_6972:1092-43243           | 1767     | 0.0       | 72.07 |
|                                                    | <i>ADAP2</i>     | ENSTSY00000019141.1 | ENSTSYG00000032948  | <i>ADAP2</i>              | 1                             | GeneScaffold_KE948064.1: 146-29,881    | 249      | 3,00E-63  | 89.19 |
|                                                    | <i>RNF135*</i>   | ENSTSYG00000034618  | ENSTSY00000032803.1 | <i>RNF135</i>             | 1                             | GeneScaffold_KE948064.1: 39,597-63,449 | 488      | 3,00E-135 | 86.74 |
|                                                    | <i>NF1</i>       | ENSTSY00000008701   | ENSTSYG00000009458  | <i>NF1</i>                | 1                             | GeneScaffold_7882:63027-162075         | 2180     | 0.0       | 93.37 |
|                                                    | <i>UTP6</i>      | ENSTSY00000002073   | ENSTSYG00000002202  | <i>UTP6</i>               | 1                             | GeneScaffold_1953:5132-31359           | 513      | 0.0       | 67.10 |
|                                                    | <i>SUZ12</i>     | ENSTSY00000002783   | ENSTSYG00000002995  | <i>SUZ12</i>              | 1                             | GeneScaffold_7092:3386-59491           | 881      | 0.0       | 87.54 |
|                                                    | <i>OMG</i>       | ENSTSY00000007966   | ENSTSYG00000008689  | <i>OMG</i>                | 1                             | scaffold_36978:4578-5864               | 583      | 0.0       | 96.50 |
|                                                    | <i>LRRC37B</i>   | -----               | -----               | -----                     | -----                         | -----                                  | -        | -         | -     |
|                                                    | <i>EVI2A</i>     | ENSTSY00000008702   | ENSTSYG00000009480  | <i>ENSTSYG00000009480</i> | 1                             | GeneScaffold_7882:107567-109672        | 294      | 1,00E-107 | 74.24 |
|                                                    | <i>EVI2B</i>     | ENSTSY00000012530   | ENSTSYG00000013659  | <i>EVI2B</i>              | 1                             | scaffold_119061:2831-3436              | 224      | 9,00E-77  | 78.16 |
|                                                    | <i>RAB11FIP4</i> | ENSTSY00000002970   | ENSTSYG00000003234  | <i>RAB11FIP4</i>          | 1                             | GeneScaffold_3344:2574-13968           | 328      | 7,00E-118 | 64.14 |
|                                                    | <i>TEFM</i>      | ENSTSY00000009060   | ENSTSYG00000009889  | <i>TEFM</i>               | 1                             | GeneScaffold_6972:47361-52491          | 456      | 7,00E-173 | 84.24 |
| <i>COPRS</i>                                       | XP_008046721     | Gene ID: 103249911  | <i>COPRS</i>        | 1                         | NW_007068165.1 (72286..79998) | 262                                    | 2,00E-88 | 76.00     |       |

Red Cells: protein sequences excluded from the study because they are very different from the others.

\* *Tarsius syrichta* *RNF135* and *Canis lupus* *LRRC37B* genes are absent because their sequence are mostly incomplete

**Table S3.** The best model of nucleotides and protein alignment.

| Genes     | Nucleotides models* | Amino acids models** |
|-----------|---------------------|----------------------|
| CRFL3     | JC                  | JTT+I                |
| ATAD5     | JC                  | JTT+I+G              |
| TEFM      | JC                  | JTT+I                |
| ADAP2     | JC                  | JTT+I+G              |
| RNF135    | JC                  | JTT+G                |
| NF1       | JC                  | JTT+I                |
| OMG       | JC                  | JTT+I                |
| EVI2B     | JC                  | JTT+G                |
| EVI2A     | JC                  | FLU+G                |
| RAB11FIP4 | JC                  | JTT+G                |
| COPRS     | JC                  | JTT+I                |
| UTP6      | JC                  | JTT+G                |
| SUZ12     | JC                  | JTT+I                |
| LRRC37B   | JC                  | JTT+I+G              |

\*calculated by JModelTest 2.1

\*\*calculated by ProTest 2.4



**Table S4.** Positively selected sites in *RNF135* and amino acid differences between species.

| <i>RNF135</i> M8                           | 4 | 5 | 6** | 8 | 12 | 30 | 34 | 47 | 50** | 51 | 56 | 57* | 58 | 60* | 61 | 62 | 69 | 72 | 75 | 76 | 79** | 94 | 95 | 100* | 103 | 104* | 105 | 106 | 107 | 108 | 109 | 113 | 115 |
|--------------------------------------------|---|---|-----|---|----|----|----|----|------|----|----|-----|----|-----|----|----|----|----|----|----|------|----|----|------|-----|------|-----|-----|-----|-----|-----|-----|-----|
| Mice ( <i>Mus musculus</i> )               | V | C | S   | N | ?  | G  | Q  | R  | H    | D  | K  | R   | G  | V   | D  | G  | I  | K  | L  | T  | K    | L  | Q  | V    | G   | S    | E   | P   | E   | ?   | ?   | ?   | ?   |
| Mouse ( <i>Rattus norvegicus</i> )         | A | C | P   | T | ?  | G  | W  | Q  | K    | D  | K  | R   | A  | V   | D  | S  | I  | K  | S  | A  | V    | R  | Q  | L    | G   | P    | E   | P   | A   | ?   | ?   | ?   | ?   |
| Cattle ( <i>Bos taurus</i> )               | L | D | A   | R | ?  | D  | W  | D  | L    | D  | R  | R   | S  | ?   | ?  | ?  | S  | E  | P  | G  | Q    | R  | L  | L    | L   | S    | ?   | ?   | ?   | ?   | ?   | E   | T   |
| Dog ( <i>Canis lupus familiaris</i> )      | P | D | P   | P | ?  | G  | W  | D  | K    | G  | G  | C   | A  | P   | P  | ?  | T  | A  | A  | E  | Q    | S  | R  | A    | ?   | ?    | ?   | ?   | ?   | ?   | ?   | ?   | ?   |
| Marmoset ( <i>Callithrix jacchus</i> )     | L | G | L   | P | P  | G  | W  | R  | E    | S  | R  | A   | A  | G   | R  | ?  | T  | E  | A  | Q  | R    | R  | R  | L    | G   | P    | D   | S   | A   | P   | R   | G   | C   |
| Orangutan ( <i>Pongo abelii</i> )          | L | G | P   | ? | S  | G  | W  | H  | E    | G  | R  | G   | V  | R   | R  | ?  | T  | Q  | A  | Q  | Q    | R  | R  | I    | G   | S    | D   | P   | A   | P   | C   | G   | S   |
| Gorilla ( <i>Gorilla gorilla gorilla</i> ) | ? | ? | ?   | ? | ?  | ?  | ?  | ?  | ?    | ?  | ?  | ?   | ?  | ?   | ?  | ?  | ?  | ?  | ?  | ?  | ?    | R  | R  | I    | G   | S    | D   | P   | A   | H   | C   | G   | S   |
| Macaque ( <i>Macaca mulatta</i> )          | L | G | K   | P | S  | E  | W  | H  | E    | G  | R  | G   | A  | R   | R  | ?  | T  | E  | A  | Q  | R    | R  | R  | L    | G   | S    | N   | S   | A   | A   | C   | G   | S   |
| Chimpanzee ( <i>Pan troglodytes</i> )      | L | G | L   | P | S  | G  | W  | H  | E    | A  | R  | G   | A  | R   | R  | ?  | T  | Q  | A  | Q  | Q    | R  | R  | I    | G   | S    | D   | P   | A   | H   | C   | G   | S   |
| Human ( <i>Homo sapiens</i> )              | L | G | L   | ? | S  | G  | W  | H  | E    | A  | R  | D   | A  | R   | R  | ?  | T  | Q  | A  | Q  | H    | R  | R  | I    | G   | S    | D   | P   | A   | H   | C   | G   | S   |

cont.

| <i>RNF135</i> M8                           | 116 | 117* | 118 | 119 | 120 | 121 | 122 | 125 | 126 | 127 | 128* | 129* | 130 | 131 | 134 | 139 | 141 | 143* | 151 | 152 | 156 | 162 | 166 | 167 | 168 | 171 | 175* | 177 |
|--------------------------------------------|-----|------|-----|-----|-----|-----|-----|-----|-----|-----|------|------|-----|-----|-----|-----|-----|------|-----|-----|-----|-----|-----|-----|-----|-----|------|-----|
| Mice ( <i>Mus musculus</i> )               | ?   | ?    | ?   | ?   | P   | A   | P   | ?   | A   | P   | R    | S    | A   | P   | T   | T   | N   | I    | R   | Q   | D   | T   | N   | L   | G   | Q   | Q    | T   |
| Mouse ( <i>Rattus norvegicus</i> )         | ?   | ?    | ?   | ?   | P   | V   | P   | L   | C   | T   | P    | T    | P   | P   | T   | T   | Q   | V    | G   | Q   | I   | T   | S   | L   | A   | L   | L    | I   |
| Cattle ( <i>Bos taurus</i> )               | P   | A    | P   | R   | P   | A   | S   | G   | R   | P   | T    | A    | Q   | L   | E   | S   | E   | D    | E   | R   | I   | S   | L   | L   | E   | P   | V    | V   |
| Dog ( <i>Canis lupus familiaris</i> )      | ?   | ?    | ?   | ?   | ?   | ?   | ?   | ?   | ?   | ?   | ?    | ?    | ?   | ?   | ?   | I   | E   | G    | E   | Q   | I   | S   | L   | P   | E   | P   | R    | T   |
| Marmoset ( <i>Callithrix jacchus</i> )     | P   | ?    | ?   | ?   | ?   | A   | P   | R   | R   | R   | G    | S    | L   | P   | E   | I   | E   | G    | E   | R   | I   | S   | L   | S   | E   | P   | L    | I   |
| Orangutan ( <i>Pongo abelii</i> )          | P   | R    | S   | S   | A   | A   | P   | R   | R   | R   | P    | E    | L   | Q   | A   | I   | E   | G    | E   | H   | I   | N   | L   | S   | E   | P   | L    | I   |
| Gorilla ( <i>Gorilla gorilla gorilla</i> ) | L   | R    | S   | S   | A   | A   | A   | R   | R   | R   | P    | E    | L   | Q   | A   | I   | E   | G    | E   | H   | I   | N   | L   | S   | E   | P   | L    | I   |
| Macaque ( <i>Macaca mulatta</i> )          | P   | G    | S   | S   | L   | T   | P   | R   | R   | R   | P    | A    | L   | P   | A   | I   | E   | G    | E   | H   | I   | N   | L   | S   | E   | P   | L    | I   |
| Chimpanzee ( <i>Pan troglodytes</i> )      | P   | R    | S   | S   | A   | A   | A   | R   | R   | R   | P    | E    | L   | Q   | A   | V   | E   | G    | E   | H   | I   | N   | L   | S   | E   | P   | L    | I   |
| Human ( <i>Homo sapiens</i> )              | S   | L    | S   | S   | A   | A   | A   | R   | R   | R   | P    | E    | L   | Q   | A   | I   | E   | A    | E   | H   | I   | N   | L   | S   | E   | P   | L    | I   |

cont.

| RNF135 M8                                  | 179** | 181** | 182 | 186 | 188 | 190 | 193 | 199 | 201 | 202* | 203 | 204 | 205 | 208 | 212 | 220 | 222 | 226 | 227* | 228 | 232 | 233 | 234 | 235* | 237 | 240 | 242 |
|--------------------------------------------|-------|-------|-----|-----|-----|-----|-----|-----|-----|------|-----|-----|-----|-----|-----|-----|-----|-----|------|-----|-----|-----|-----|------|-----|-----|-----|
| Mice ( <i>Mus musculus</i> )               | P     | D     | S   | S   | G   | H   | D   | T   | S   | I    | S   | Q   | K   | Q   | H   | K   | Q   | P   | G    | R   | R   | E   | R   | V    | ?   | ?   | E   |
| Mouse ( <i>Rattus norvegicus</i> )         | H     | D     | S   | S   | E   | Y   | D   | T   | S   | A    | S   | Q   | K   | Q   | R   | T   | Q   | T   | G    | N   | K   | K   | Q   | V    | ?   | ?   | E   |
| Cattle ( <i>Bos taurus</i> )               | A     | T     | L   | D   | V   | L   | A   | S   | S   | P    | P   | E   | Q   | K   | H   | K   | R   | T   | Q    | K   | E   | E   | Q   | T    | V   | P   | V   |
| Dog ( <i>Canis lupus familiaris</i> )      | S     | G     | M   | D   | A   | L   | A   | T   | D   | T    | P   | E   | R   | K   | H   | K   | Q   | T   | W    | K   | E   | E   | H   | L    | V   | Q   | A   |
| Marmoset ( <i>Callithrix jacchus</i> )     | G     | T     | F   | S   | V   | L   | A   | T   | D   | A    | A   | A   | G   | K   | H   | K   | R   | S   | W    | K   | E   | A   | P   | T    | R   | L   | A   |
| Orangutan ( <i>Pongo abelii</i> )          | S     | A     | F   | S   | V   | L   | A   | T   | D   | T    | A   | A   | G   | R   | H   | K   | Q   | T   | R    | K   | E   | A   | Q   | M    | G   | L   | A   |
| Gorilla ( <i>Gorilla gorilla gorilla</i> ) | G     | A     | F   | S   | V   | L   | A   | T   | D   | T    | A   | A   | G   | R   | H   | K   | Q   | T   | R    | K   | E   | A   | Q   | M    | G   | L   | A   |
| Macaque ( <i>Macaca mulatta</i> )          | G     | V     | F   | S   | V   | L   | T   | I   | D   | T    | A   | A   | G   | R   | Q   | K   | R   | A   | R    | K   | E   | A   | Q   | T    | G   | P   | A   |
| Chimpanzee ( <i>Pan troglodytes</i> )      | G     | A     | F   | S   | V   | L   | A   | T   | D   | T    | A   | A   | G   | R   | H   | K   | Q   | T   | R    | K   | E   | A   | Q   | M    | G   | L   | A   |
| Human ( <i>Homo sapiens</i> )              | G     | A     | F   | S   | V   | L   | A   | T   | D   | T    | A   | A   | G   | R   | H   | K   | Q   | T   | W    | K   | E   | A   | Q   | M    | G   | L   | A   |

cont.

| RNF135 M8                                  | 243 | 244 | 247 | 248 | 255* | 256 | 258 | 260 | 263* | 266 | 270 | 276 | 286* | 288* | 290* | 295 | 297** | 299 | 300 | 302 | 305* | 309 | 319 | 324 | 332 | 346 | 349 |
|--------------------------------------------|-----|-----|-----|-----|------|-----|-----|-----|------|-----|-----|-----|------|------|------|-----|-------|-----|-----|-----|------|-----|-----|-----|-----|-----|-----|
| Mice ( <i>Mus musculus</i> )               | M   | T   | L   | C   | R    | P   | P   | K   | H    | L   | S   | R   | N    | S    | R    | R   | D     | H   | T   | H   | P    | S   | L   | K   | N   | K   | G   |
| Mouse ( <i>Rattus norvegicus</i> )         | M   | A   | V   | G   | Y    | P   | S   | K   | Q    | L   | S   | R   | N    | C    | M    | R   | A     | Q   | P   | H   | S    | S   | F   | K   | N   | K   | K   |
| Cattle ( <i>Bos taurus</i> )               | P   | S   | S   | C   | R    | F   | P   | K   | S    | R   | S   | E   | V    | L    | T    | D   | F     | M   | L   | A   | P    | A   | L   | H   | R   | K   | Q   |
| Dog ( <i>Canis lupus familiaris</i> )      | P   | S   | S   | H   | C    | P   | P   | R   | Q    | Q   | S   | R   | E    | C    | V    | H   | W     | Q   | T   | L   | H    | V   | F   | Q   | H   | R   | Q   |
| Marmoset ( <i>Callithrix jacchus</i> )     | Q   | S   | S   | C   | ?    | P   | L   | R   | H    | Q   | N   | K   | R    | F    | T    | P   | R     | Q   | P   | R   | C    | S   | L   | H   | N   | S   | Q   |
| Orangutan ( <i>Pongo abelii</i> )          | P   | S   | S   | C   | H    | P   | L   | R   | R    | Q   | H   | K   | K    | S    | T    | H   | R     | Q   | P   | R   | C    | S   | L   | H   | N   | S   | Q   |
| Gorilla ( <i>Gorilla gorilla gorilla</i> ) | P   | S   | S   | C   | H    | P   | L   | R   | R    | Q   | R   | K   | K    | S    | T    | H   | R     | Q   | P   | R   | C    | S   | L   | H   | N   | S   | Q   |
| Macaque ( <i>Macaca mulatta</i> )          | P   | S   | S   | C   | H    | P   | L   | R   | Q    | Q   | H   | K   | T    | S    | T    | H   | R     | Q   | P   | R   | C    | S   | L   | H   | N   | S   | Q   |
| Chimpanzee ( <i>Pan troglodytes</i> )      | P   | S   | S   | C   | H    | P   | L   | R   | R    | Q   | H   | K   | K    | S    | T    | H   | R     | Q   | P   | R   | C    | S   | L   | H   | N   | S   | Q   |
| Human ( <i>Homo sapiens</i> )              | P   | S   | S   | C   | H    | P   | L   | R   | R    | Q   | H   | K   | K    | S    | T    | H   | R     | Q   | P   | R   | C    | S   | L   | H   | N   | S   | Q   |

cont.

| <i>RNF135 M8</i>                           | 355 | 358 | 365 | 366 | 372 | 380* | 383 | 385 | 395 | 409 | 414 | 417 | 419 | 431* | 435 | 437 | 439* | 440 | 441 | 442 | 443 | 444 |
|--------------------------------------------|-----|-----|-----|-----|-----|------|-----|-----|-----|-----|-----|-----|-----|------|-----|-----|------|-----|-----|-----|-----|-----|
| Mice ( <i>Mus musculus</i> )               | M   | W   | P   | G   | A   | Q    | L   | E   | S   | L   | E   | S   | S   | S    | Y   | E   | K    | Q   | L   | N   | T   | ?   |
| Mouse ( <i>Rattus norvegicus</i> )         | M   | W   | P   | S   | A   | S    | P   | E   | L   | P   | E   | S   | S   | T    | Y   | E   | L    | Q   | I   | Y   | K   | I   |
| Cattle ( <i>Bos taurus</i> )               | T   | W   | A   | S   | C   | G    | R   | S   | E   | P   | P   | V   | V   | D    | S   | T   | R    | K   | M   | N   | V   | ?   |
| Dog ( <i>Canis lupus familiaris</i> )      | K   | Y   | N   | S   | H   | G    | R   | K   | E   | L   | P   | A   | S   | N    | S   | T   | R    | P   | V   | N   | V   | ?   |
| Marmoset ( <i>Callithrix jacchus</i> )     | T   | C   | T   | N   | H   | G    | R   | G   | E   | L   | T   | A   | S   | H    | Y   | I   | K    | Q   | V   | K   | V   | ?   |
| Orangutan ( <i>Pongo abelii</i> )          | M   | C   | T   | S   | H   | G    | R   | G   | E   | L   | T   | A   | S   | H    | Y   | I   | K    | Q   | V   | K   | V   | ?   |
| Gorilla ( <i>Gorilla gorilla gorilla</i> ) | M   | C   | T   | S   | H   | G    | R   | G   | E   | L   | T   | A   | S   | H    | Y   | I   | K    | Q   | V   | K   | V   | ?   |
| Macaque ( <i>Macaca mulatta</i> )          | M   | C   | T   | N   | H   | G    | R   | G   | E   | L   | T   | A   | S   | H    | H   | I   | K    | Q   | V   | K   | V   | ?   |
| Chimpanzee ( <i>Pan troglodytes</i> )      | M   | C   | T   | S   | H   | G    | R   | G   | E   | L   | T   | A   | S   | H    | Y   | I   | K    | Q   | V   | K   | V   | ?   |
| Human ( <i>Homo sapiens</i> )              | M   | C   | T   | S   | H   | G    | R   | G   | E   | L   | T   | A   | S   | H    | Y   | I   | K    | Q   | V   | K   | V   | ?   |

Naive Empirical Bayes (NEB) p>95%\*; p>99%\*\* ; Bayes Empirical Bayes (BEB) p>95%#; p>99%##

**Table S5.** Positively selected sites in *UTP6* and amino acid differences between species.

| <i>UTP6</i> M8                             | 73 | 204 | 345 | 357 | 371 | 378 | 382 | 383 | 384 | 412 | 416 | 423 | 425 | 544 | 585 |
|--------------------------------------------|----|-----|-----|-----|-----|-----|-----|-----|-----|-----|-----|-----|-----|-----|-----|
| Mice ( <i>Mus musculus</i> )               | A  | A   | V   | L   | V   | D   | R   | Q   | D   | Q   | D   | E   | R   | S   | L   |
| Mouse ( <i>Rattus norvegicus</i> )         | A  | A   | V   | R   | V   | D   | R   | Q   | D   | L   | D   | G   | H   | T   | M   |
| Cattle ( <i>Bos taurus</i> )               | A  | N   | R   | V   | L   | K   | H   | R   | Q   | E   | T   | S   | G   | N   | Q   |
| Dog ( <i>Canis lupus familiaris</i> )      | T  | K   | Q   | M   | F   | D   | H   | H   | D   | Q   | N   | A   | C   | V   | M   |
| Tarsier ( <i>Tarsius syrichta</i> )        | L  | S   | G   | T   | V   | ?   | ?   | ?   | ?   | ?   | ?   | ?   | ?   | T   | A   |
| Gibbon ( <i>Nomascus leucogenys</i> )      | T  | S   | G   | T   | C   | V   | C   | H   | N   | R   | E   | A   | L   | A   | A   |
| Marmoset ( <i>Callithrix jacchus</i> )     | K  | S   | G   | T   | F   | K   | S   | H   | K   | Q   | D   | A   | Q   | A   | A   |
| Orangutan ( <i>Pongo abelii</i> )          | T  | S   | G   | T   | C   | V   | C   | R   | N   | R   | E   | A   | L   | A   | A   |
| Gorilla ( <i>Gorilla gorilla gorilla</i> ) | T  | S   | G   | T   | C   | V   | C   | H   | N   | Q   | E   | A   | L   | A   | A   |
| Macaque ( <i>Macaca mulatta</i> )          | T  | S   | G   | T   | C   | V   | C   | H   | K   | R   | E   | A   | L   | T   | A   |
| Chimpanzee ( <i>Pan troglodytes</i> )      | T  | S   | G   | T   | C   | V   | R   | Y   | N   | Q   | E   | A   | L   | ?   | ?   |
| Human ( <i>Homo sapiens</i> )              | T  | S   | G   | T   | C   | V   | C   | Y   | N   | Q   | E   | A   | L   | A   | A   |

Naive Empirical Bayes (NEB) p>95%\*; p>99%\*\* ; Bayes Empirical Bayes (BEB) p>95%#; p>99%##

**Table S6.** Positively selected sites in *LRRC37B* and amino acid differences between species.

| <i>LRRC37B</i> M2                          | 3 | 19 | 372 | 386 | 397 | 402 | 406 | 923 | 959 |
|--------------------------------------------|---|----|-----|-----|-----|-----|-----|-----|-----|
| Mice ( <i>Mus musculus</i> )               | V | P  | N   | L   | I   | E   | E   | G   | C   |
| Mouse ( <i>Rattus norvegicus</i> )         | ? | ?  | S   | F   | I   | E   | E   | A   | Y   |
| Cattle ( <i>Bos taurus</i> )               | V | W  | K   | P   | S   | E   | S   | A   | Y   |
| Gibbon ( <i>Nomascus leucogenys</i> )      | W | Y  | N   | N   | A   | E   | E   | M   | L   |
| Marmoset ( <i>Callithrix jacchus</i> )     | ? | ?  | S   | V   | K   | E   | Q   | F   | S   |
| Orangutan ( <i>Pongo abelii</i> )          | ? | S  | N   | I   | S   | R   | A   | ?   | ?   |
| Gorilla ( <i>Gorilla gorilla gorilla</i> ) | W | S  | N   | I   | F   | M   | A   | ?   | ?   |
| Macaque ( <i>Macaca mulatta</i> )          | P | T  | F   | A   | L   | T   | A   | T   | R   |
| Chimpanzee ( <i>Pan troglodytes</i> )      | W | C  | S   | I   | S   | T   | A   | I   | H   |
| Human ( <i>Homo sapiens</i> )              | W | S  | N   | I   | S   | R   | D   | M   | N   |

| <i>LRRC37B</i> M8                          | 3 | 19 | 82 | 158 | 234 | 289 | 324 | 340 | 371 | 372 | 375 | 386 | 397 | 402 | 406 | 645 | 668 | 834 | 923 | 959 |
|--------------------------------------------|---|----|----|-----|-----|-----|-----|-----|-----|-----|-----|-----|-----|-----|-----|-----|-----|-----|-----|-----|
| Mice ( <i>Mus musculus</i> )               | W | Y  | L  | K   | S   | L   | M   | Q   | K   | N   | A   | N   | A   | E   | E   | R   | H   | S   | M   | L   |
| Mouse ( <i>Rattus norvegicus</i> )         | ? | ?  | ?  | Y   | Q   | L   | N   | I   | D   | S   | N   | F   | I   | E   | E   | F   | E   | T   | A   | Y   |
| Cattle ( <i>Bos taurus</i> )               | V | W  | D  | G   | H   | E   | Q   | S   | T   | K   | E   | P   | S   | E   | S   | R   | F   | S   | A   | Y   |
| Gibbon ( <i>Nomascus leucogenys</i> )      | W | S  | S  | W   | S   | L   | M   | Q   | K   | N   | T   | I   | F   | M   | A   | ?   | ?   | ?   | ?   | ?   |
| Marmoset ( <i>Callithrix jacchus</i> )     | ? | ?  | ?  | R   | Q   | R   | Q   | I   | S   | S   | L   | V   | K   | E   | Q   | I   | T   | S   | F   | S   |
| Orangutan ( <i>Pongo abelii</i> )          | W | C  | S  | K   | G   | L   | V   | Q   | K   | S   | T   | I   | S   | T   | A   | H   | L   | S   | I   | H   |
| Gorilla ( <i>Gorilla gorilla gorilla</i> ) | W | S  | S  | W   | S   | L   | M   | Q   | K   | N   | T   | I   | S   | R   | D   | Q   | L   | S   | M   | N   |
| Macaque ( <i>Macaca mulatta</i> )          | V | P  | M  | Y   | Q   | L   | H   | I   | G   | N   | N   | L   | I   | E   | E   | Y   | A   | V   | G   | C   |
| Chimpanzee ( <i>Pan troglodytes</i> )      | ? | S  | S  | W   | S   | L   | M   | Q   | K   | N   | T   | I   | S   | R   | A   | Q   | L   | ?   | ?   | ?   |
| Human ( <i>Homo sapiens</i> )              | P | T  | S  | K   | S   | F   | M   | Q   | K   | F   | V   | A   | L   | T   | A   | R   | F   | S   | T   | R   |

Naive Empirical Bayes (NEB) p>95%\*; p>99%\*\* ; Bayes Empirical Bayes (BEB) p>95%#; p>99%##

**Table S7.** Positively selected sites in *EVI2B* and amino acid differences between species.

| <i>EVI2B</i> M8                            | 30 | 37 | 41 | 42 | 43 | 56 | 65 | 76 | 104 | 106 | 113 | 120 | 135 | 143 | 166 | 171 | 185 | 186 | 194 | 197 | 199 | 202 | 207 | 281 | 320 | 360 | 399 | 400 | 422 | 428 | 441 | 446 |
|--------------------------------------------|----|----|----|----|----|----|----|----|-----|-----|-----|-----|-----|-----|-----|-----|-----|-----|-----|-----|-----|-----|-----|-----|-----|-----|-----|-----|-----|-----|-----|-----|
| Mice ( <i>Mus musculus</i> )               | K  | V  | M  | S  | H  | L  | I  | V  | Y   | ?   | M   | Q   | H   | T   | T   | P   | R   | S   | V   | N   | Q   | Q   | Y   | P   | A   | S   | I   | I   | N   | L   | S   | N   |
| Mouse ( <i>Rattus norvegicus</i> )         | H  | P  | A  | V  | H  | L  | I  | T  | ?   | ?   | I   | G   | H   | K   | L   | R   | P   | P   | P   | G   | G   | H   | H   | P   | M   | E   | I   | N   | I   | R   | L   | M   |
| Cattle ( <i>Bos taurus</i> )               | R  | F  | M  | P  | Y  | S  | L  | I  | Y   | V   | I   | G   | Y   | ?   | S   | I   | R   | K   | F   | T   | N   | K   | A   | V   | A   | G   | S   | K   | N   | N   | F   | N   |
| Dog ( <i>Canis lupus familiaris</i> )      | K  | L  | R  | Q  | H  | M  | V  | D  | S   | P   | T   | Q   | P   | ?   | S   | P   | R   | N   | T   | N   | N   | H   | S   | P   | A   | S   | F   | K   | N   | N   | S   | S   |
| Tarsier ( <i>Tarsius syrichta</i> )        | K  | F  | M  | P  | ?  | ?  | ?  | ?  | ?   | ?   | ?   | ?   | ?   | ?   | ?   | ?   | ?   | ?   | ?   | ?   | ?   | ?   | ?   | T   | A   | N   | I   | R   | V   | I   | S   | D   |
| Gibbon ( <i>Nomascus leucogenys</i> )      | K  | F  | M  | S  | H  | L  | T  | V  | Y   | ?   | M   | Q   | H   | T   | T   | P   | K   | S   | T   | N   | Q   | Q   | Y   | P   | V   | S   | I   | I   | N   | L   | P   | N   |
| Marmoset ( <i>Callithrix jacchus</i> )     | K  | F  | T  | S  | Y  | M  | T  | A  | S   | ?   | T   | Q   | H   | T   | P   | P   | R   | S   | A   | N   | R   | Q   | N   | P   | V   | S   | T   | I   | N   | L   | S   | N   |
| Orangutan ( <i>Pongo abelii</i> )          | K  | F  | T  | S  | H  | L  | T  | V  | Y   | ?   | M   | Q   | H   | P   | T   | P   | R   | S   | T   | N   | Q   | Q   | Y   | P   | V   | S   | I   | I   | N   | L   | S   | N   |
| Gorilla ( <i>Gorilla gorilla gorilla</i> ) | K  | L  | M  | S  | H  | L  | T  | V  | Y   | ?   | I   | Q   | H   | K   | T   | P   | R   | S   | T   | N   | Q   | H   | Y   | P   | V   | S   | I   | M   | N   | L   | S   | N   |
| Macaque ( <i>Macaca mulatta</i> )          | K  | V  | M  | S  | H  | L  | I  | V  | Y   | ?   | M   | Q   | H   | T   | T   | P   | R   | S   | V   | N   | Q   | Q   | Y   | P   | A   | S   | I   | I   | N   | L   | S   | N   |
| Chimpanzee ( <i>Pan troglodytes</i> )      | K  | F  | M  | S  | H  | L  | T  | V  | Y   | ?   | I   | Q   | H   | K   | T   | P   | R   | S   | T   | N   | Q   | Q   | Y   | P   | V   | S   | I   | I   | N   | L   | C   | N   |
| Human ( <i>Homo sapiens</i> )              | K  | F  | M  | S  | Q  | L  | T  | V  | Y   | ?   | I   | Q   | R   | K   | T   | P   | R   | S   | T   | N   | Q   | Q   | Y   | P   | V   | S   | I   | I   | N   | L   | S   | N   |

Naive Empirical Bayes (NEB) p>95%\*; p>99%\*\* ; Bayes Empirical Bayes (BEB) p>95%#; p>99%##

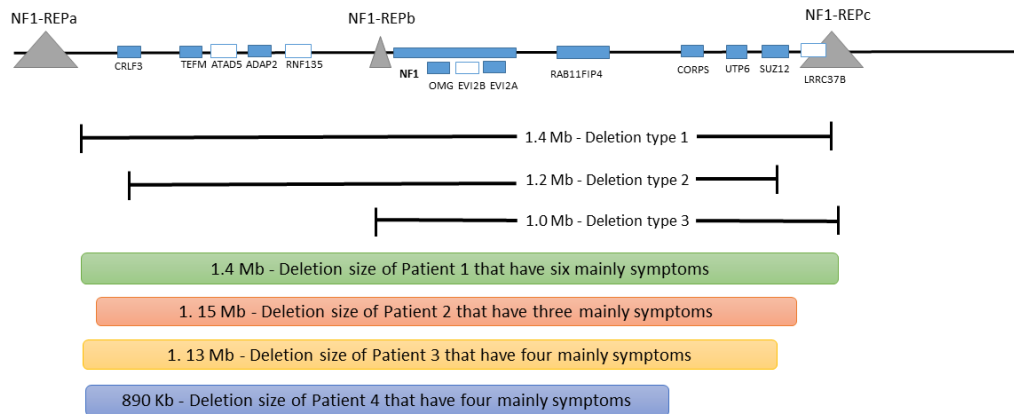

**Supplementary Figure 1.** Representation of existing microdeletions in patients with neurofibromatosis (type 1, 2 and 3 deletions) and deletions found in the previously analyzed patients [18]. Gray triangles represent the breakpoint regions NF1REPa, NF1REPb and NF1REPc. Blue rectangles indicate functional genes that are under purifying selection, empty rectangles indicate the functional genes under positive selection, colored rectangles represent the sizes of deletions found in the patients recruited in this study.

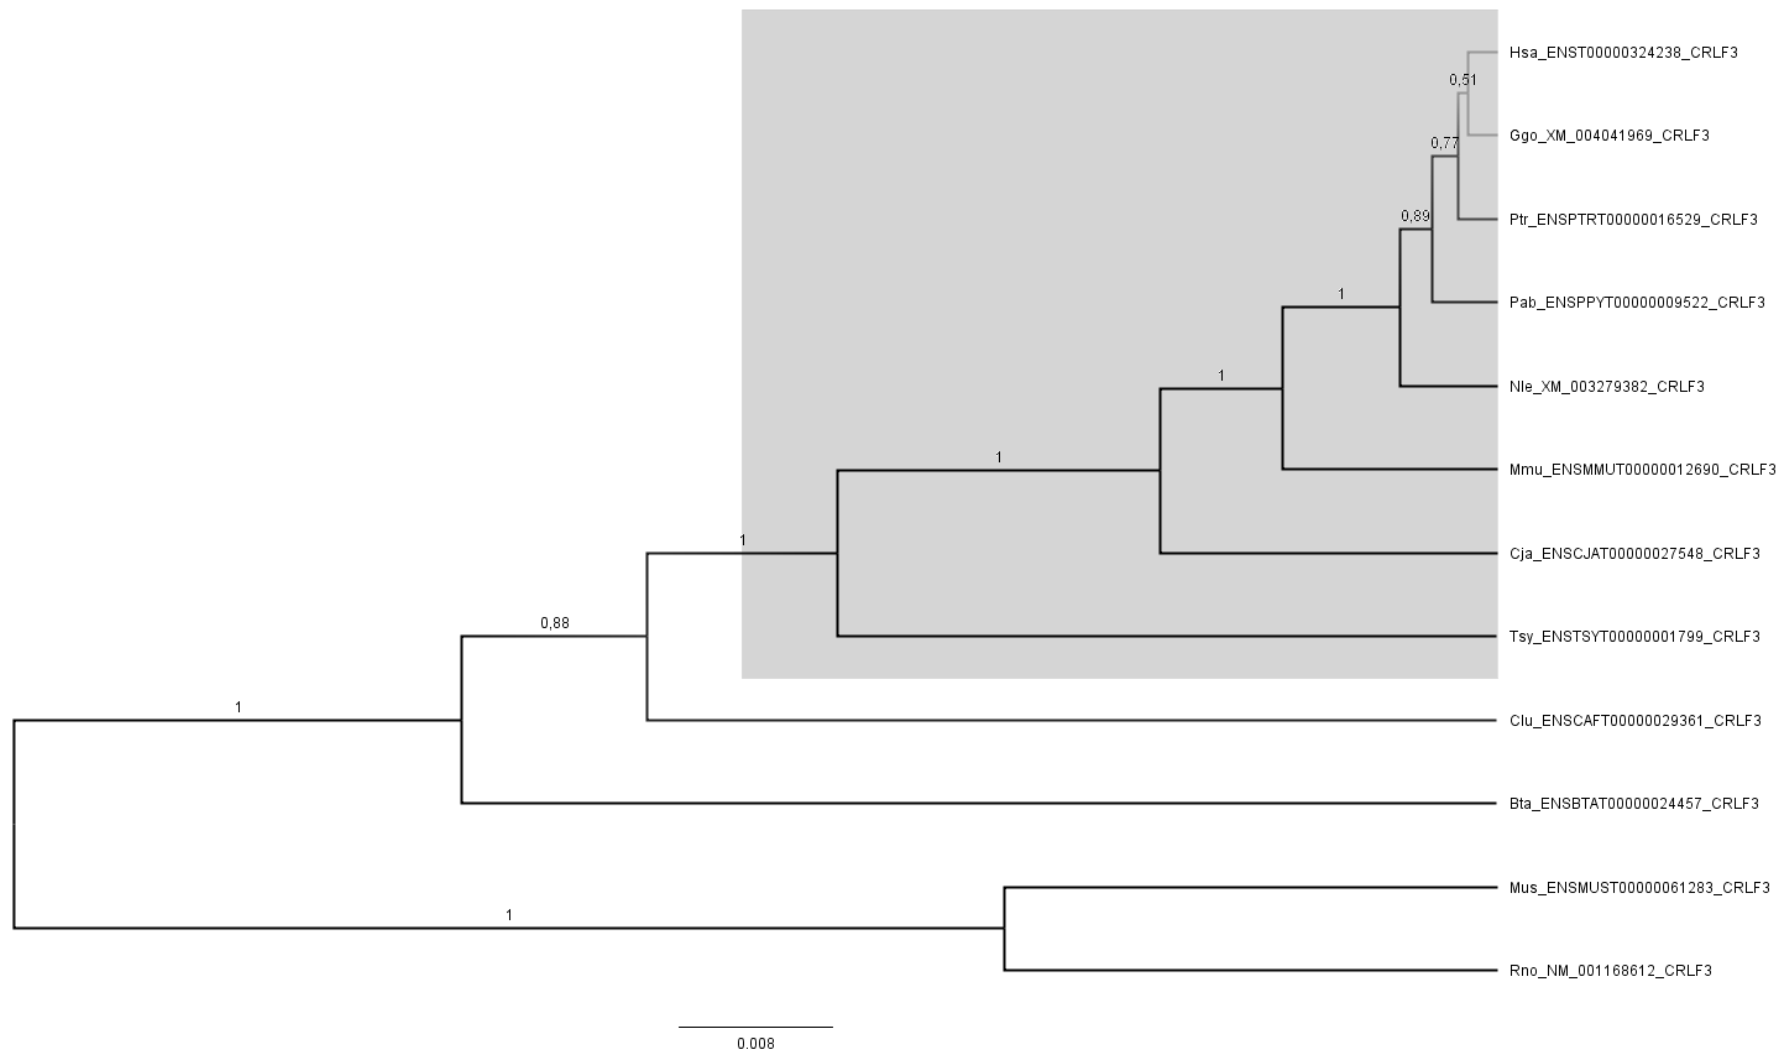

**Supplementary Figure 2. Phylogenetic tree of *CRLF3* gene reconstructed based on nucleotides sequences.**



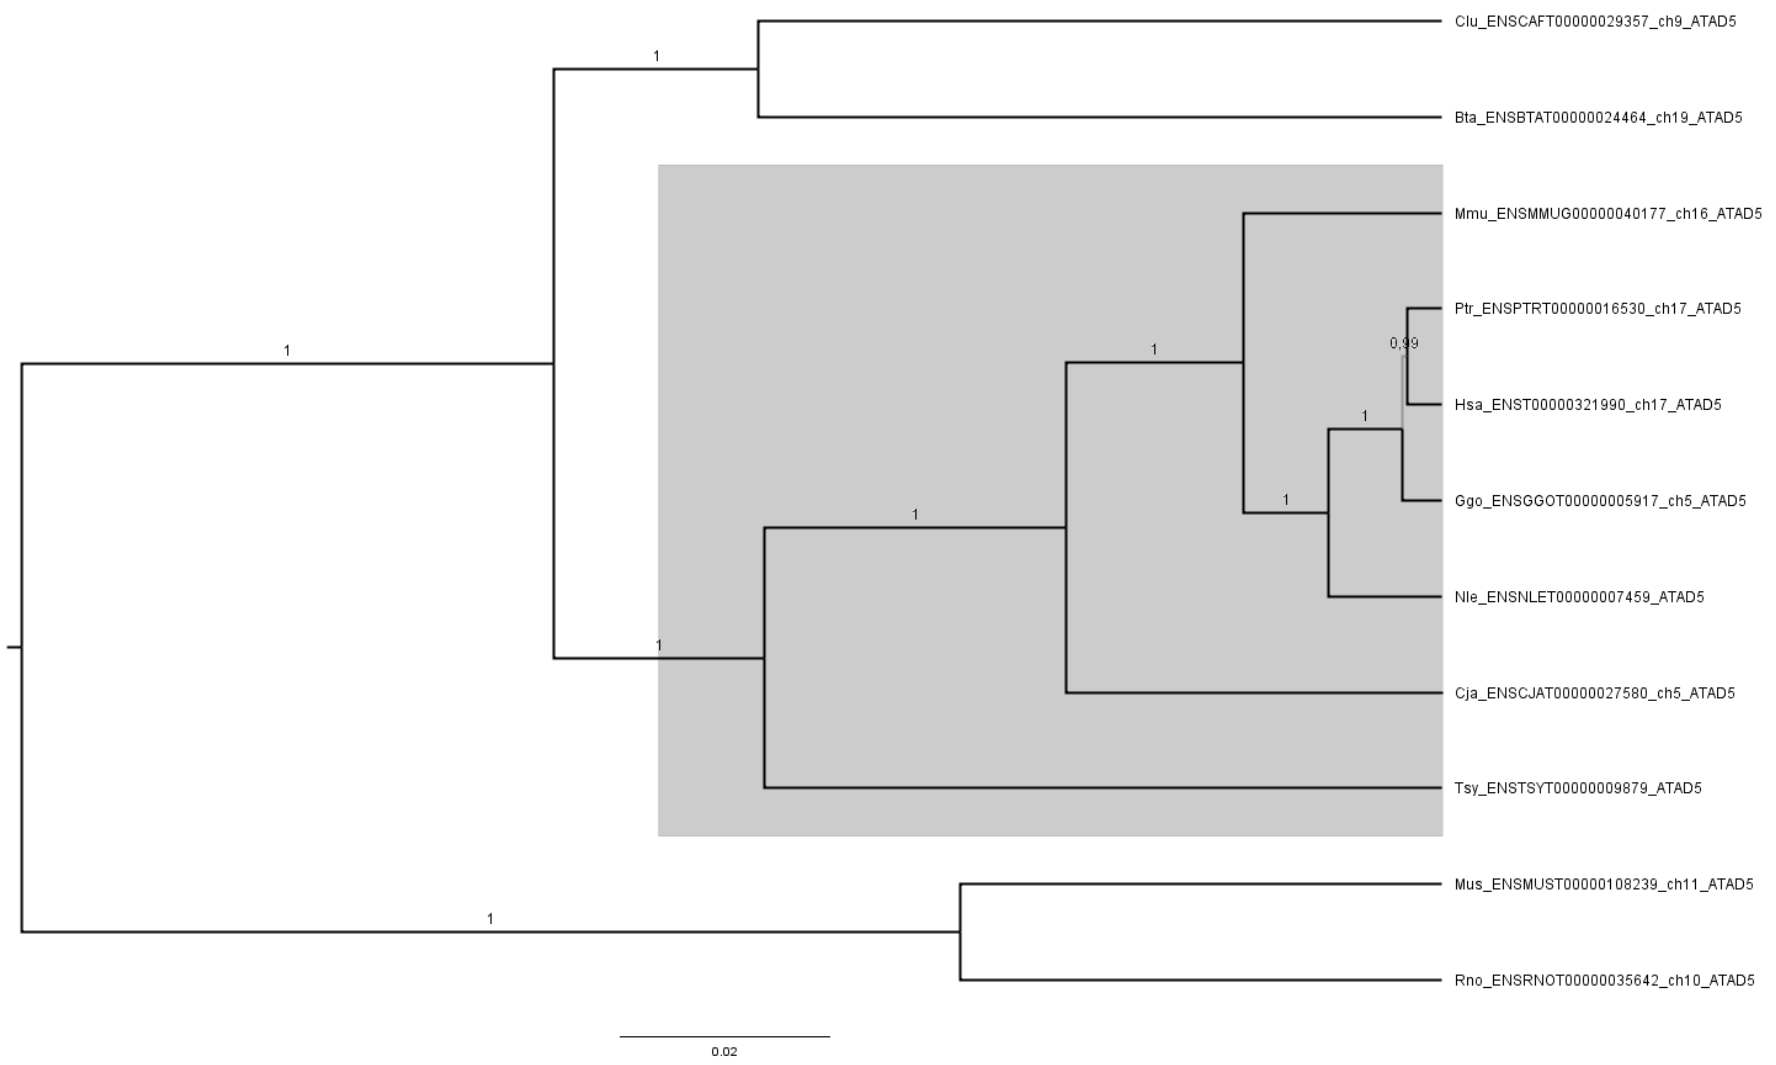

**Supplementary Figure 3. Phylogenetic tree of *ATAD5* gene reconstructed based on nucleotides sequences.**

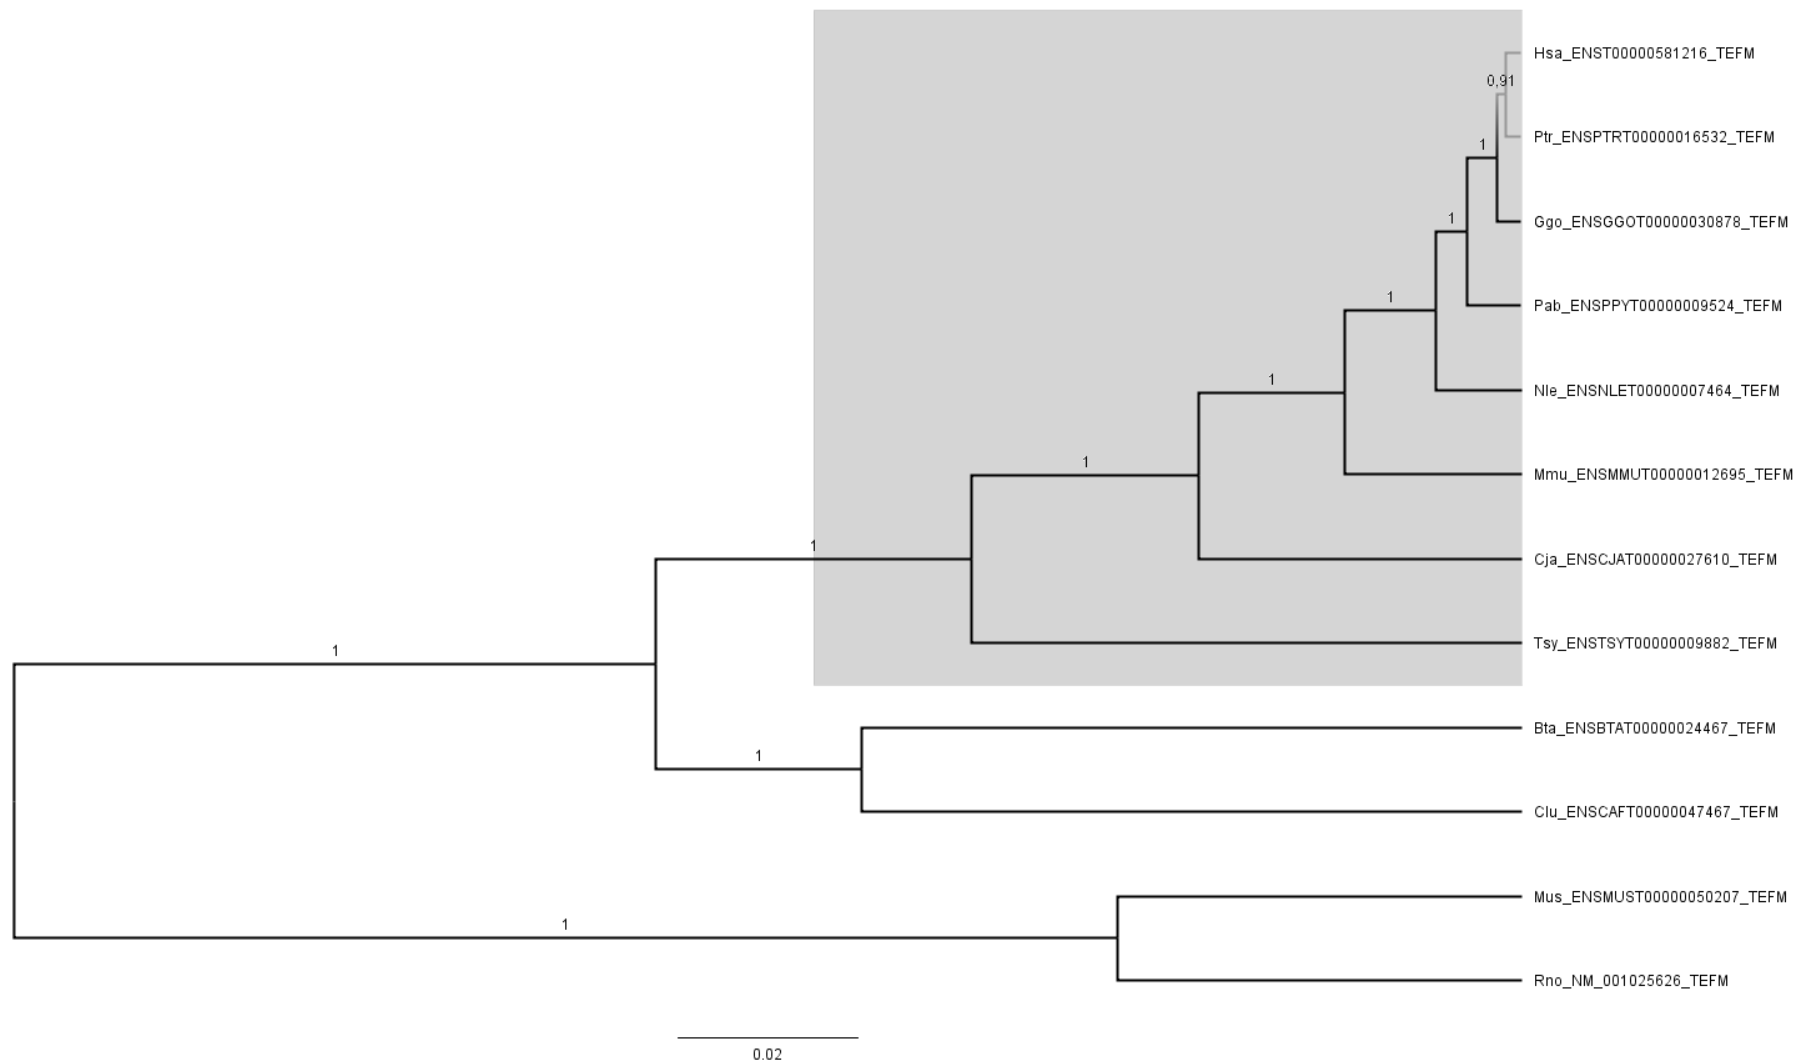

**Supplementary Figure 4. Phylogenetic tree of *TEFM* gene reconstructed based on nucleotides sequences.**

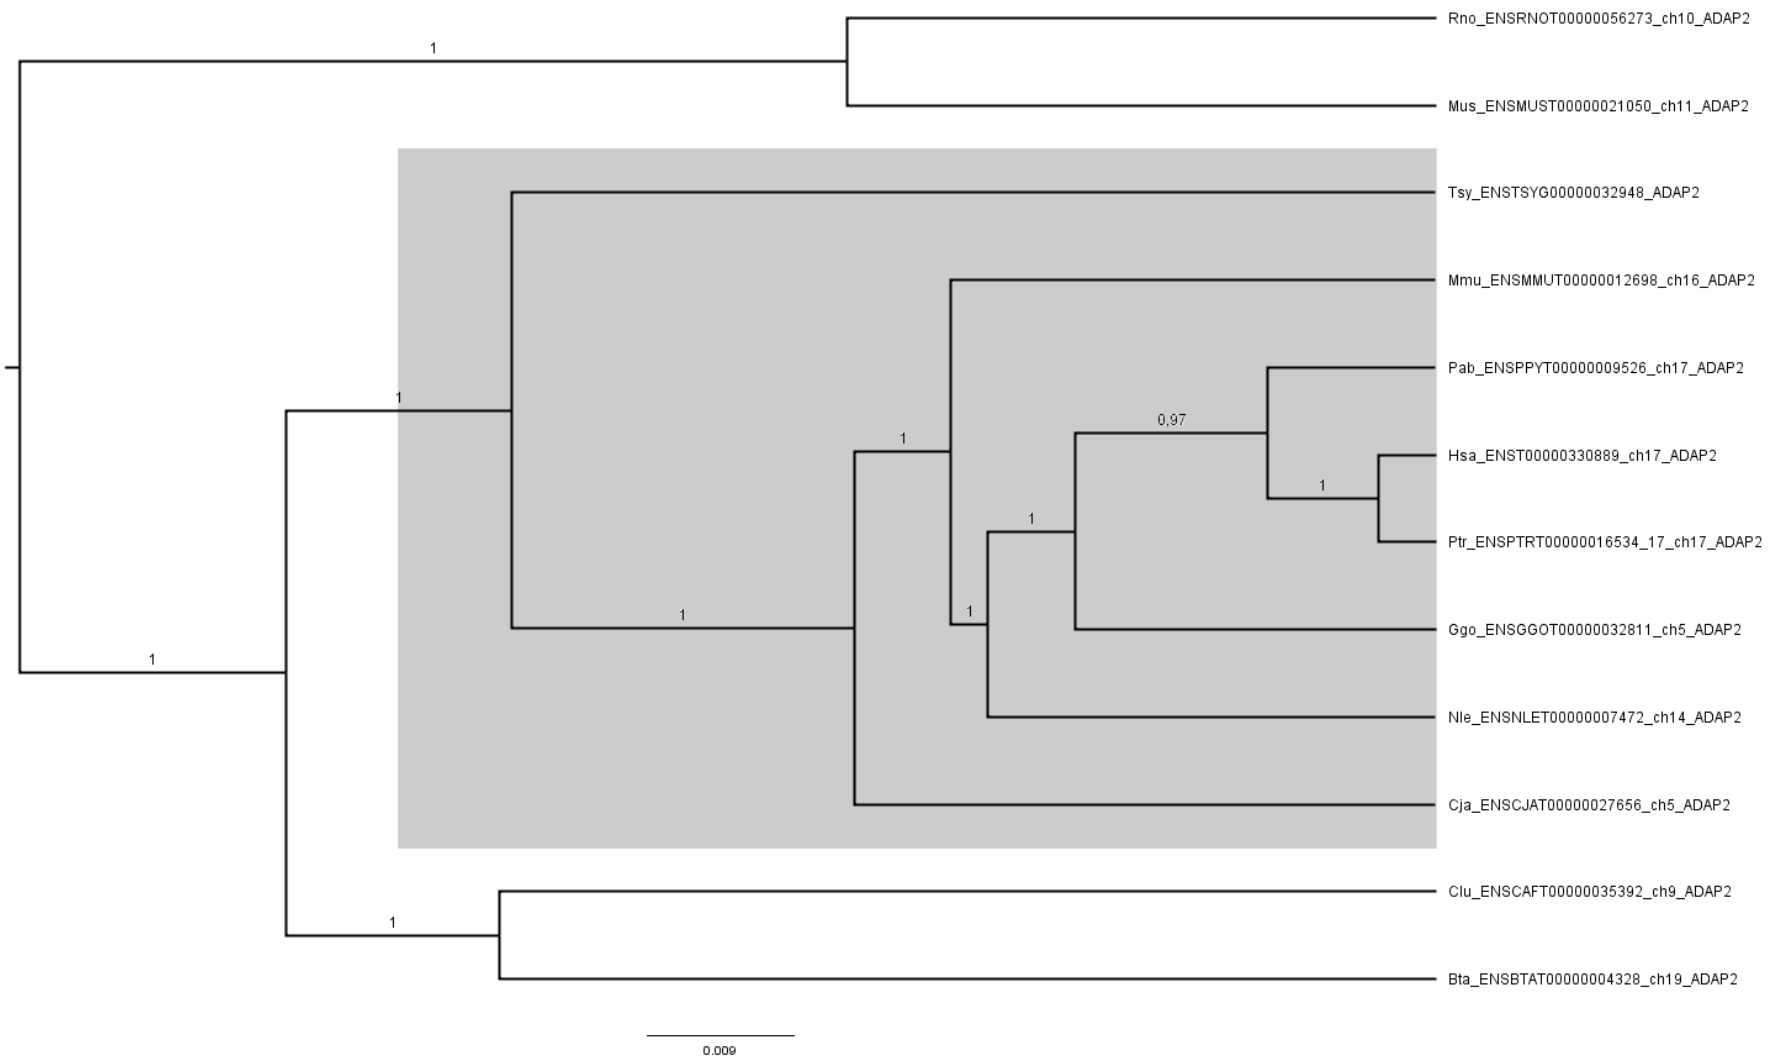

**Supplementary Figure 5. Phylogenetic tree of *ADAP2* gene reconstructed based on nucleotides sequences.**

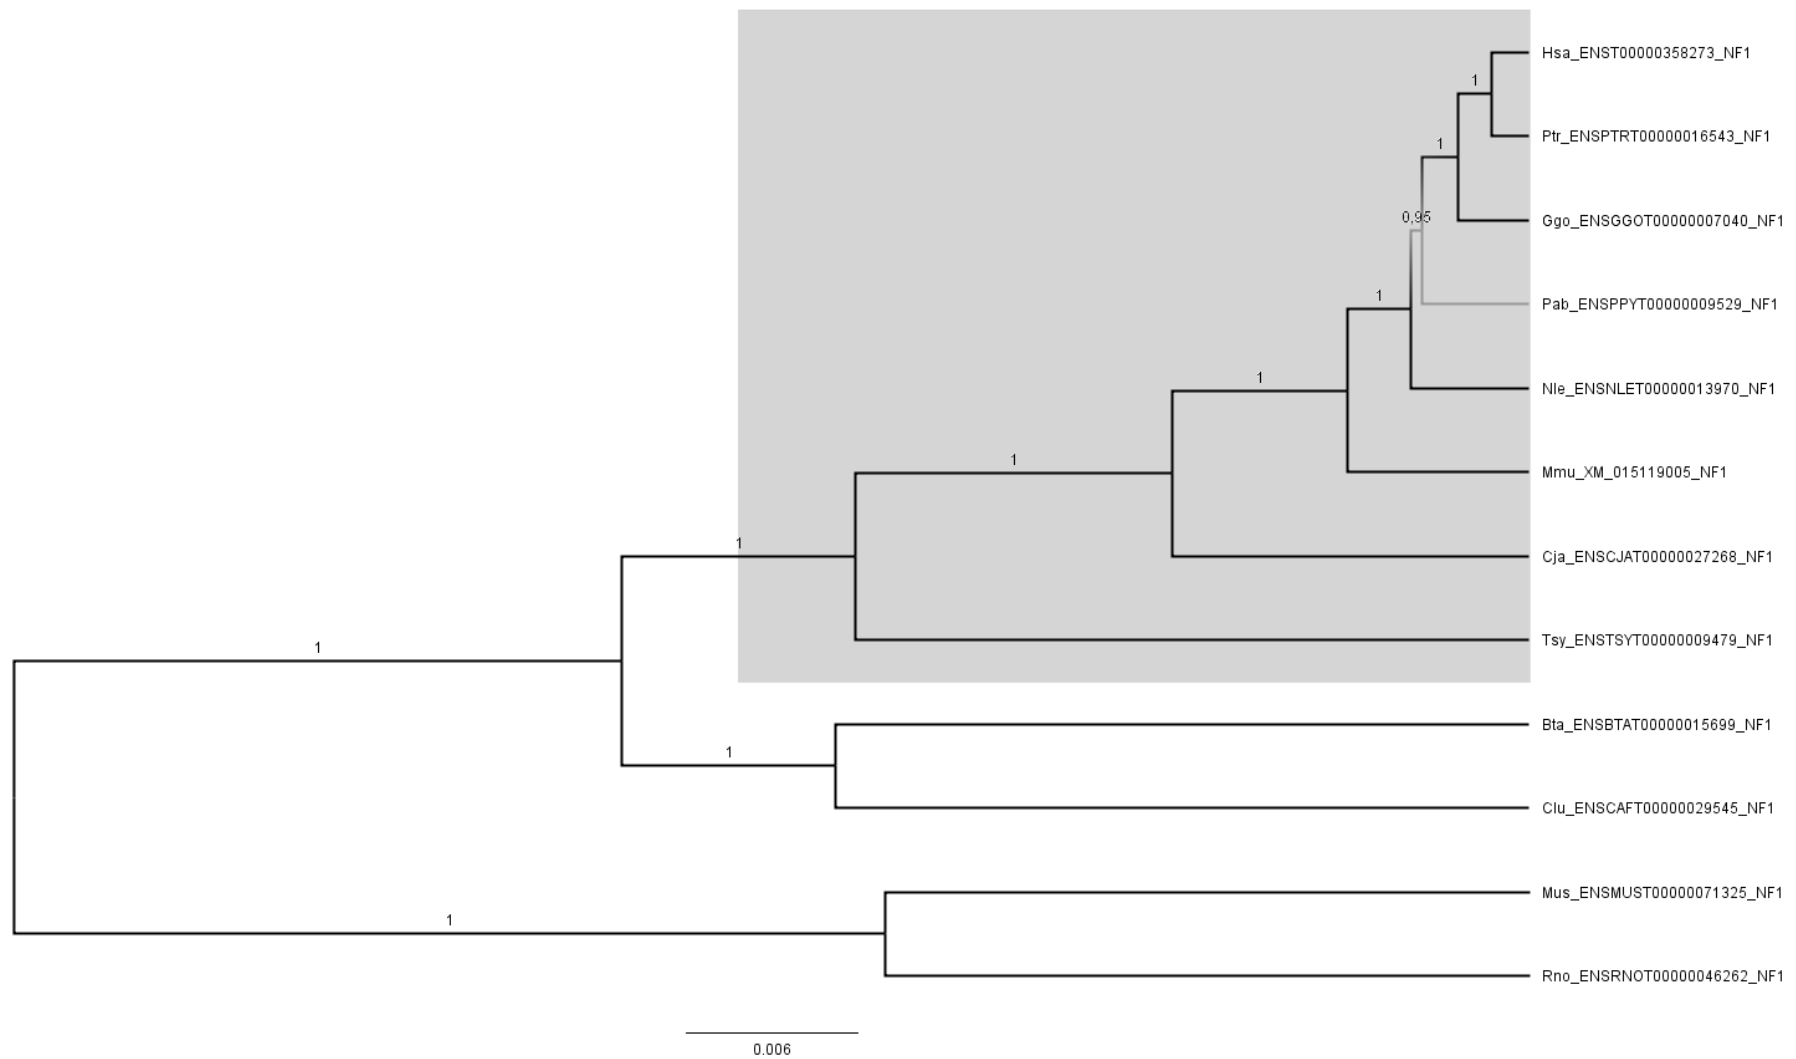

**Supplementary Figure 6. Phylogenetic tree of *NF1* gene reconstructed based on nucleotides sequences.**

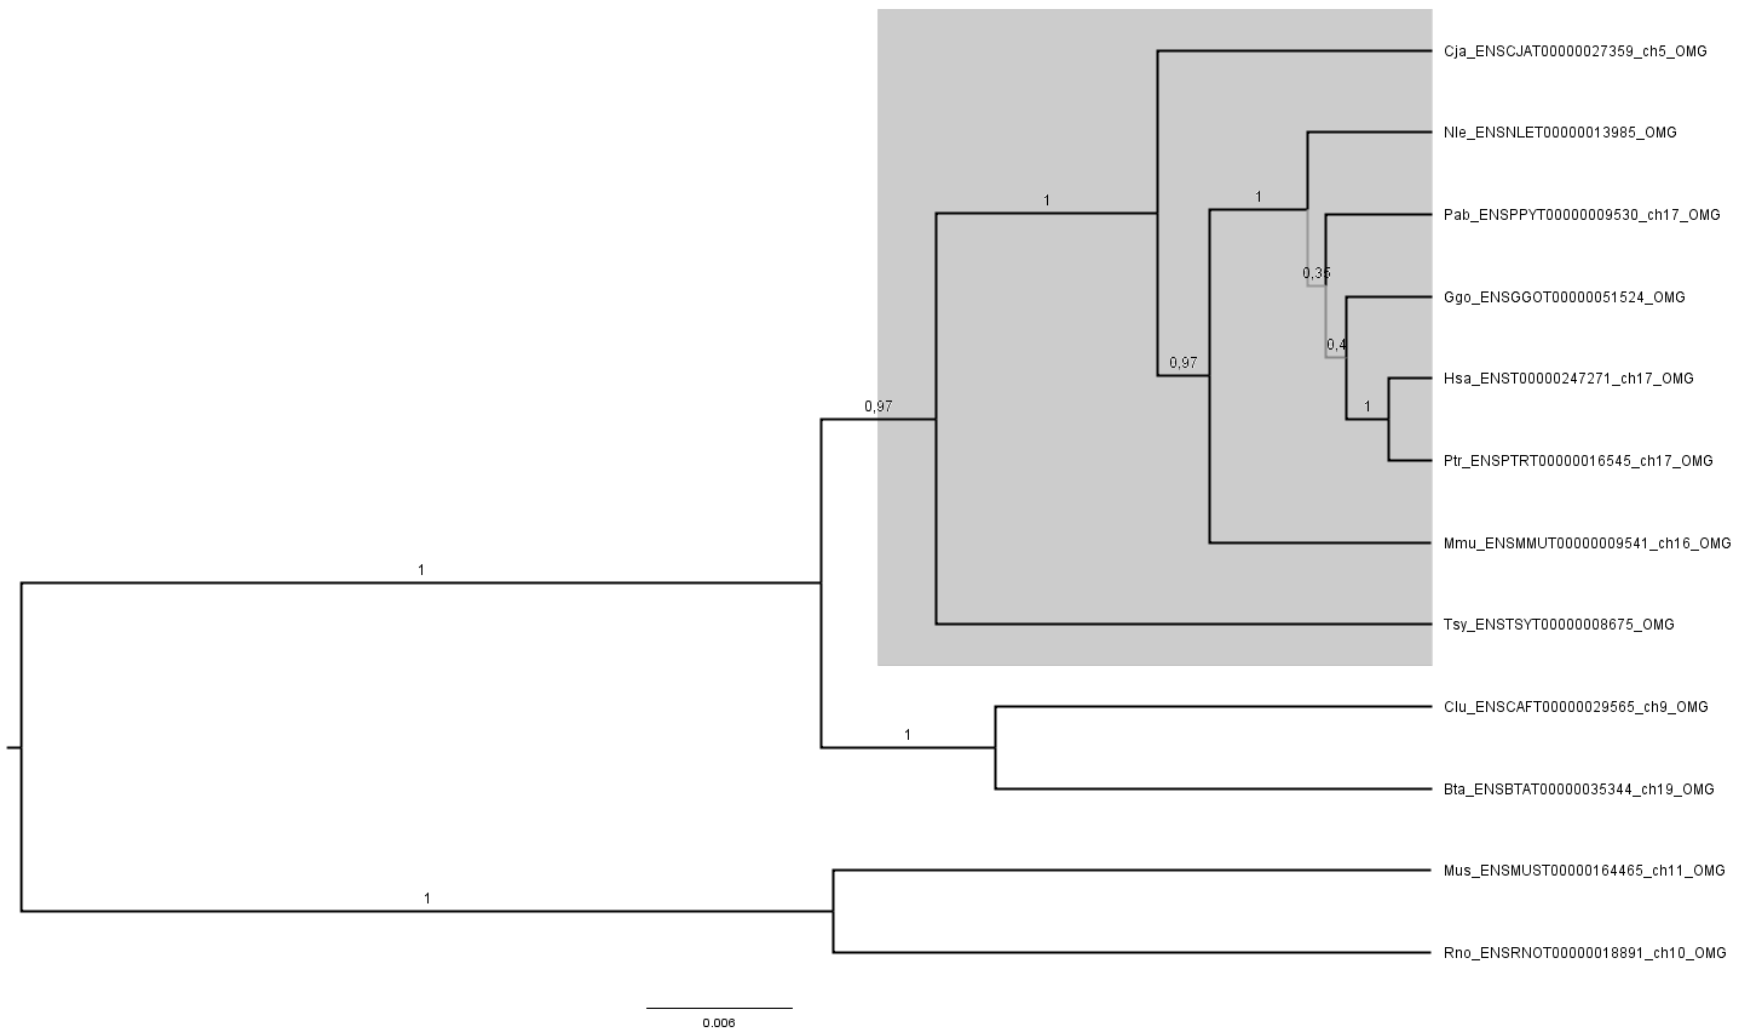

**Supplementary Figure 7. Phylogenetic tree of *OMG* gene reconstructed based on nucleotides sequences.**

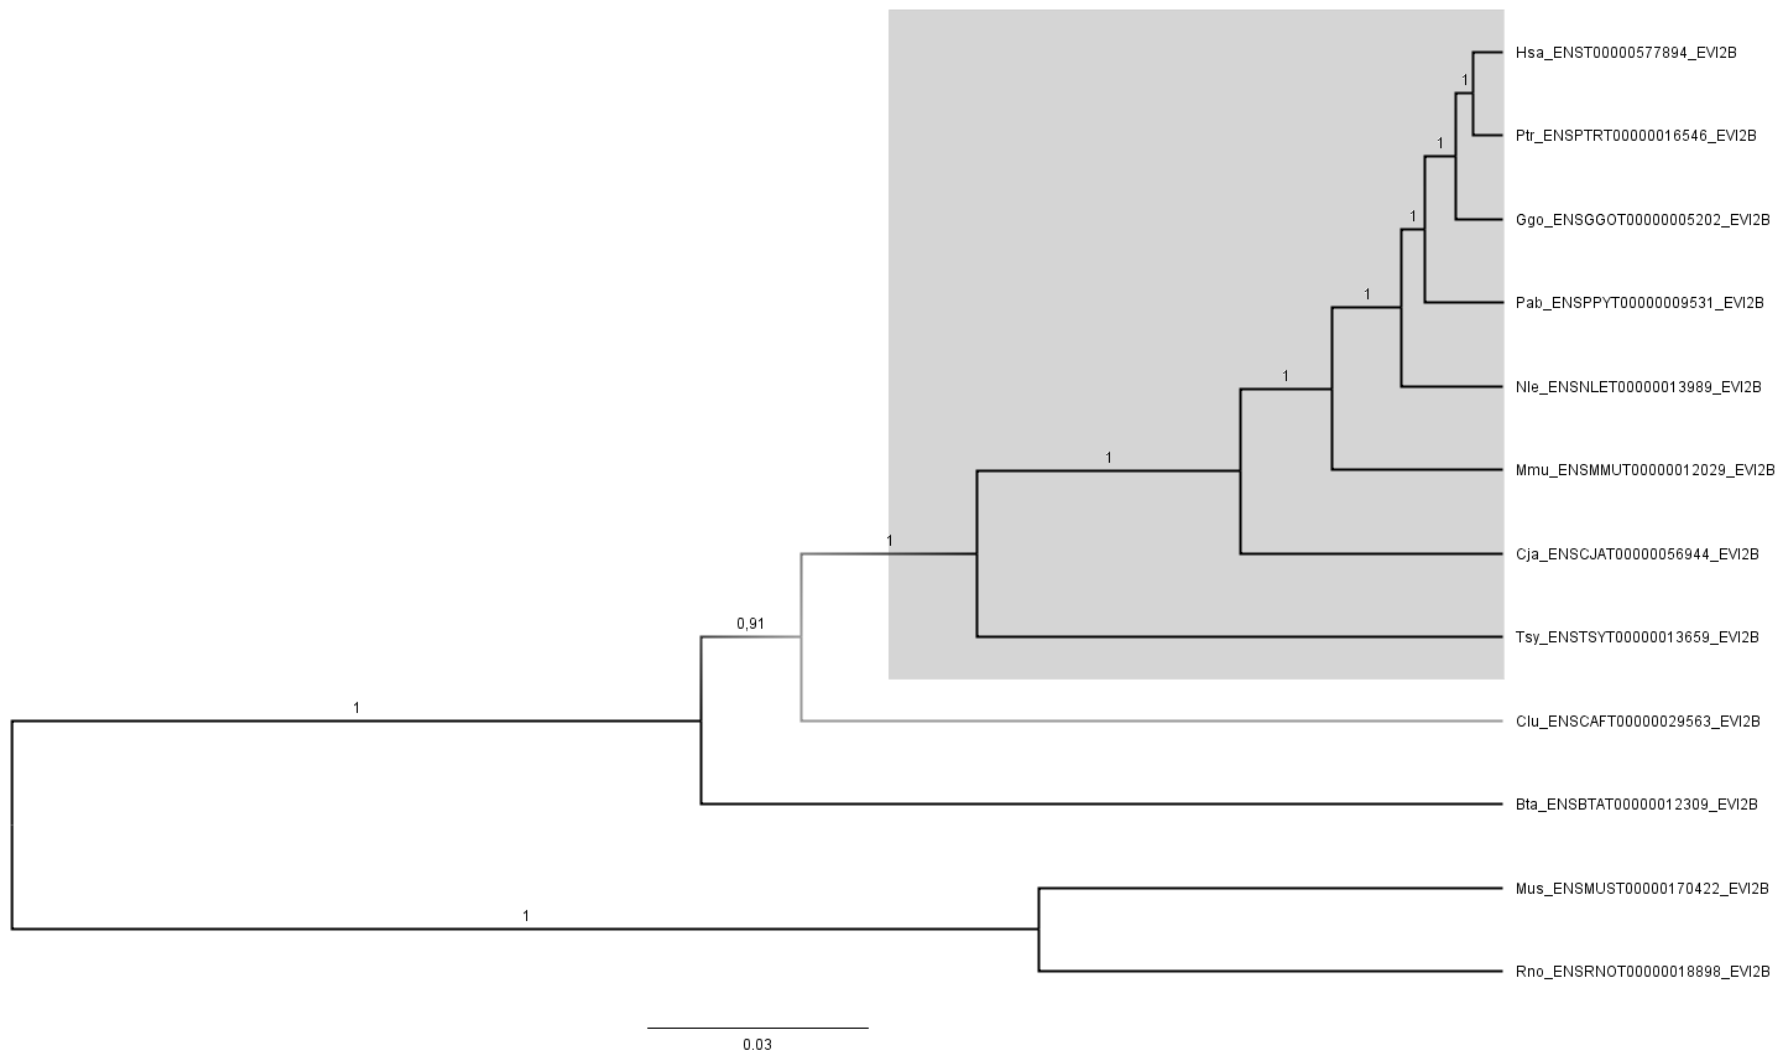

**Supplementary Figure 8. Phylogenetic tree of *EVI2B* gene reconstructed based on nucleotides sequences.**

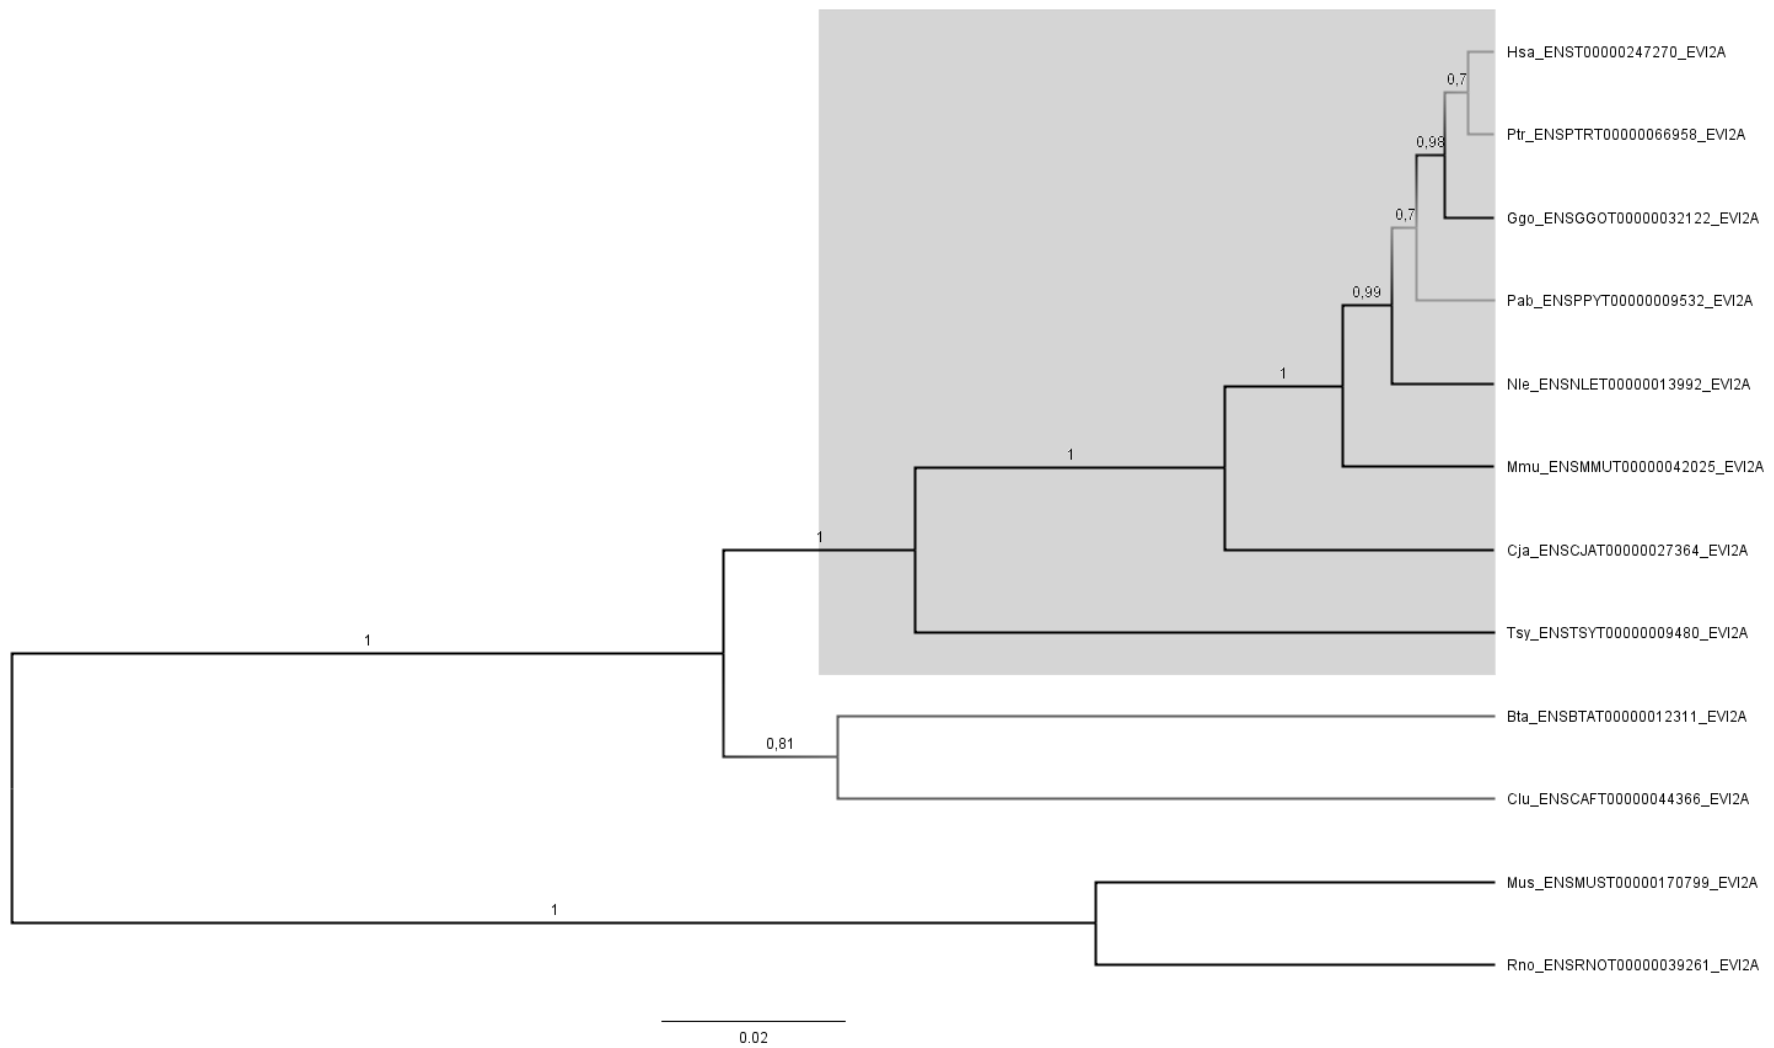

**Supplementary Figure 9. Phylogenetic tree of *EVI2A* gene reconstructed based on nucleotides sequences.**

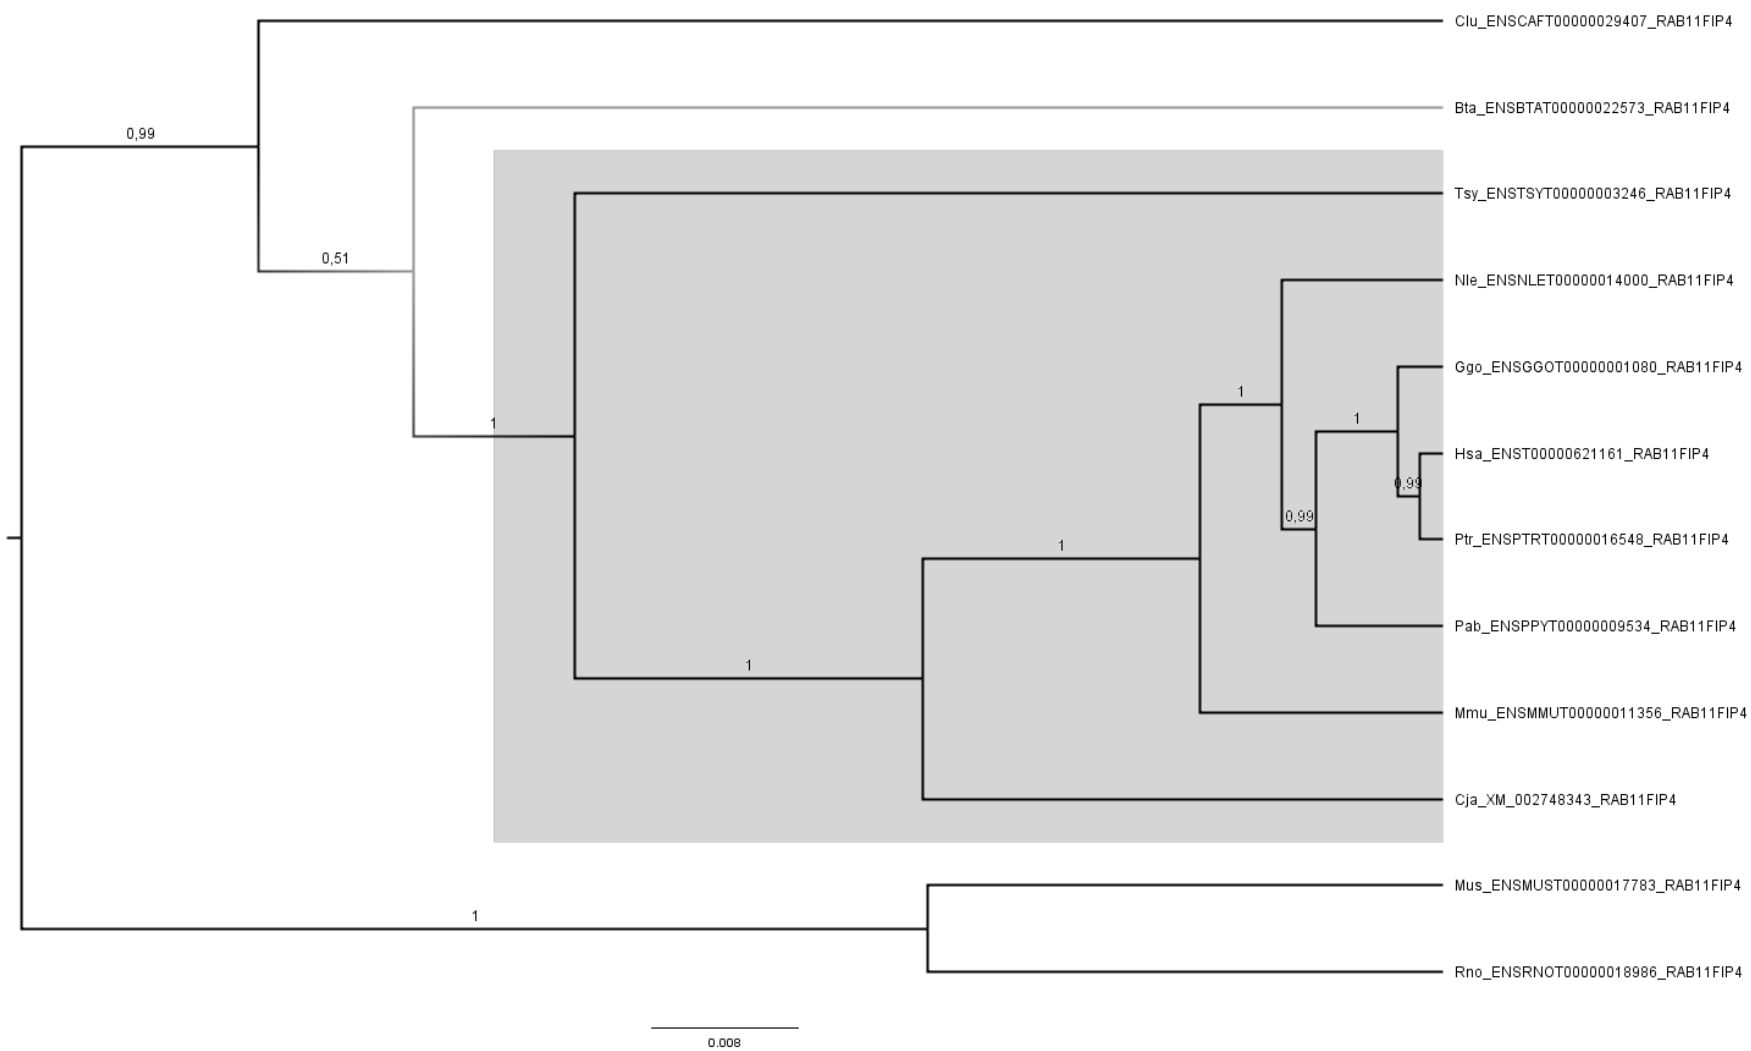

**Supplementary Figure 10. Phylogenetic tree of *RAB11FIP4* gene reconstructed based on nucleotides sequences.**



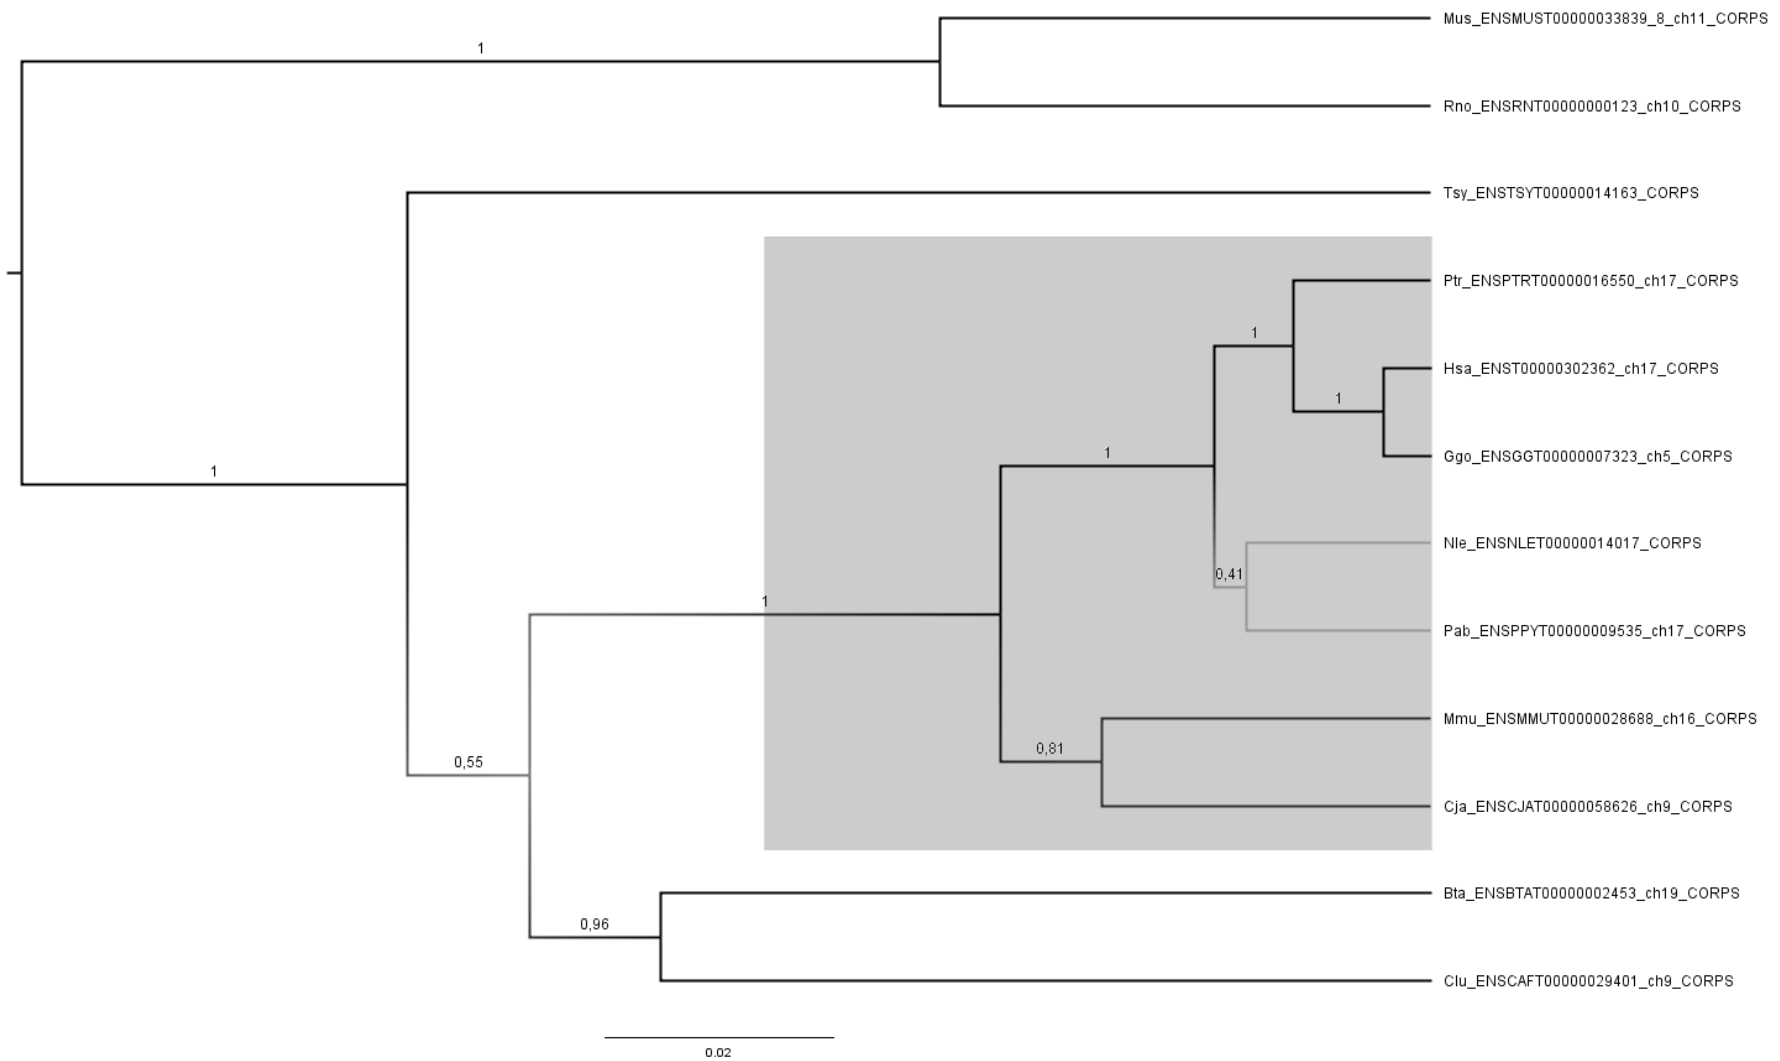

**Supplementary Figure 11. Phylogenetic tree of *COPRS* gene reconstructed based on nucleotides sequences.**

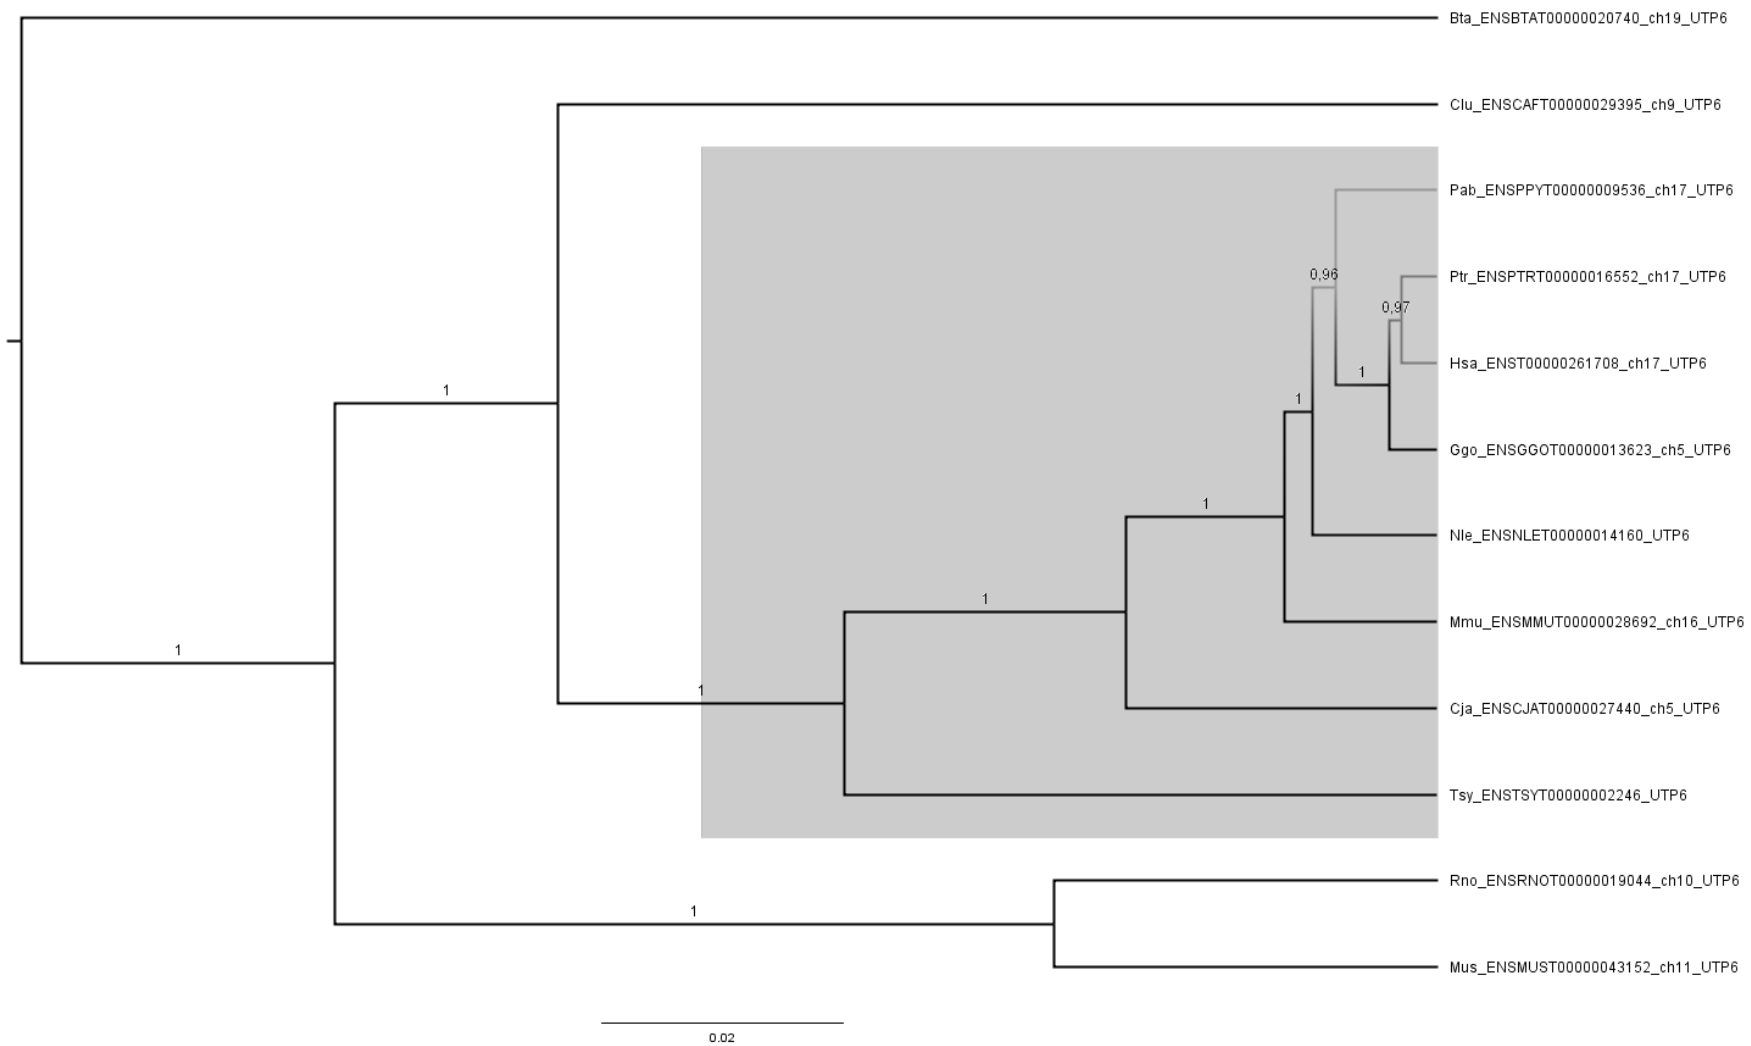

**Supplementary Figure 12. Phylogenetic tree of *UTP6* gene reconstructed based on nucleotides sequences.**

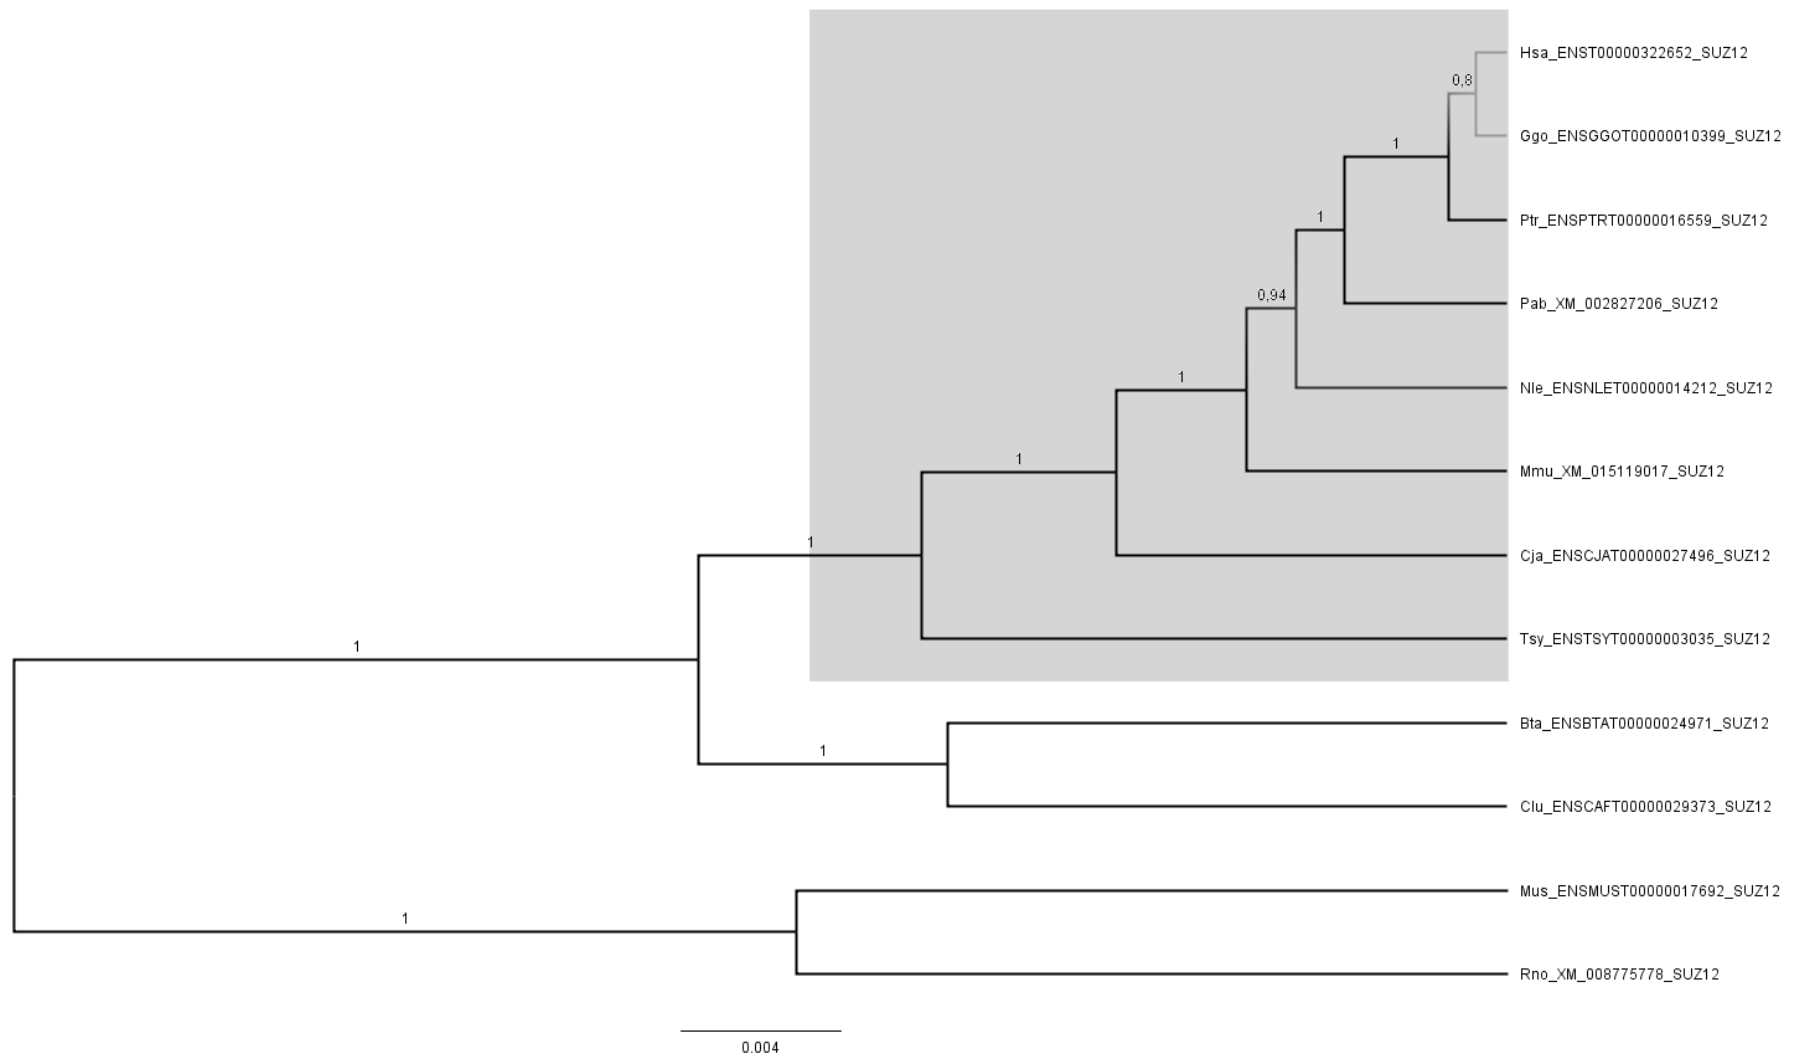

**Supplementary Figure 13. Phylogenetic tree of *SUZ12* gene reconstructed based on nucleotides sequences.**

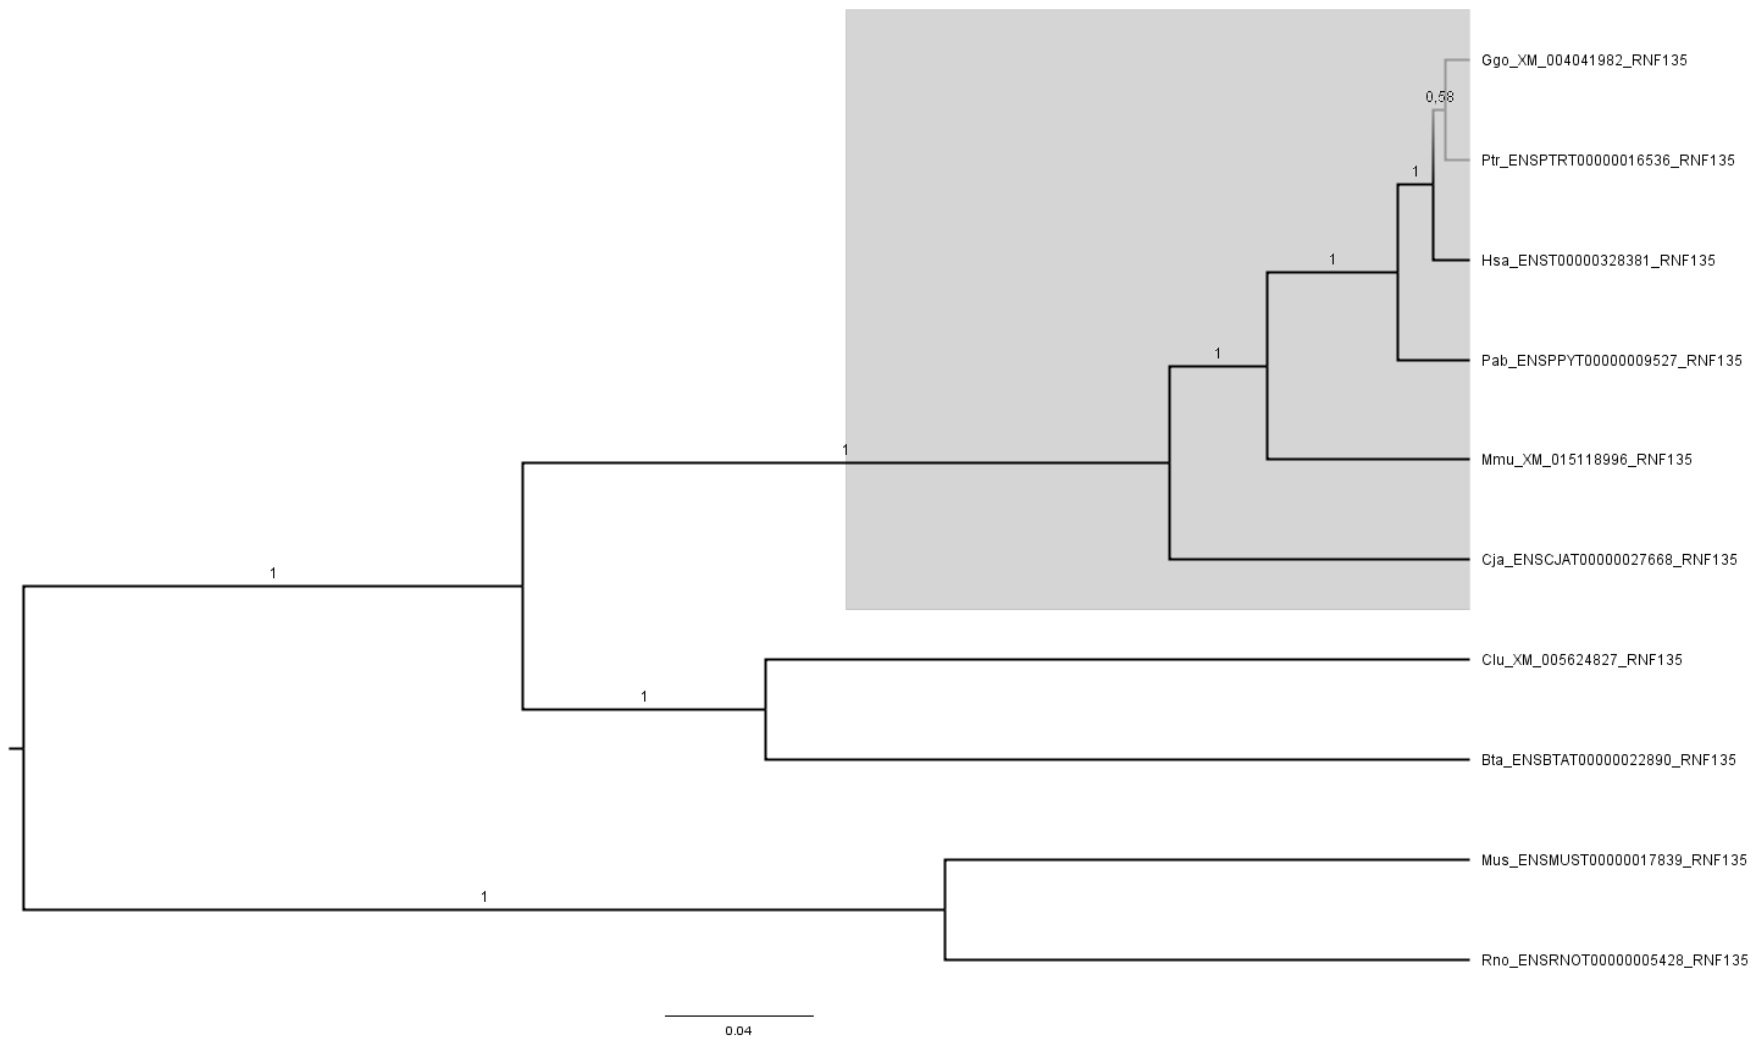

**Supplementary Figure 14. Phylogenetic tree of *RNF135* gene reconstructed based on amino acid sequences.**

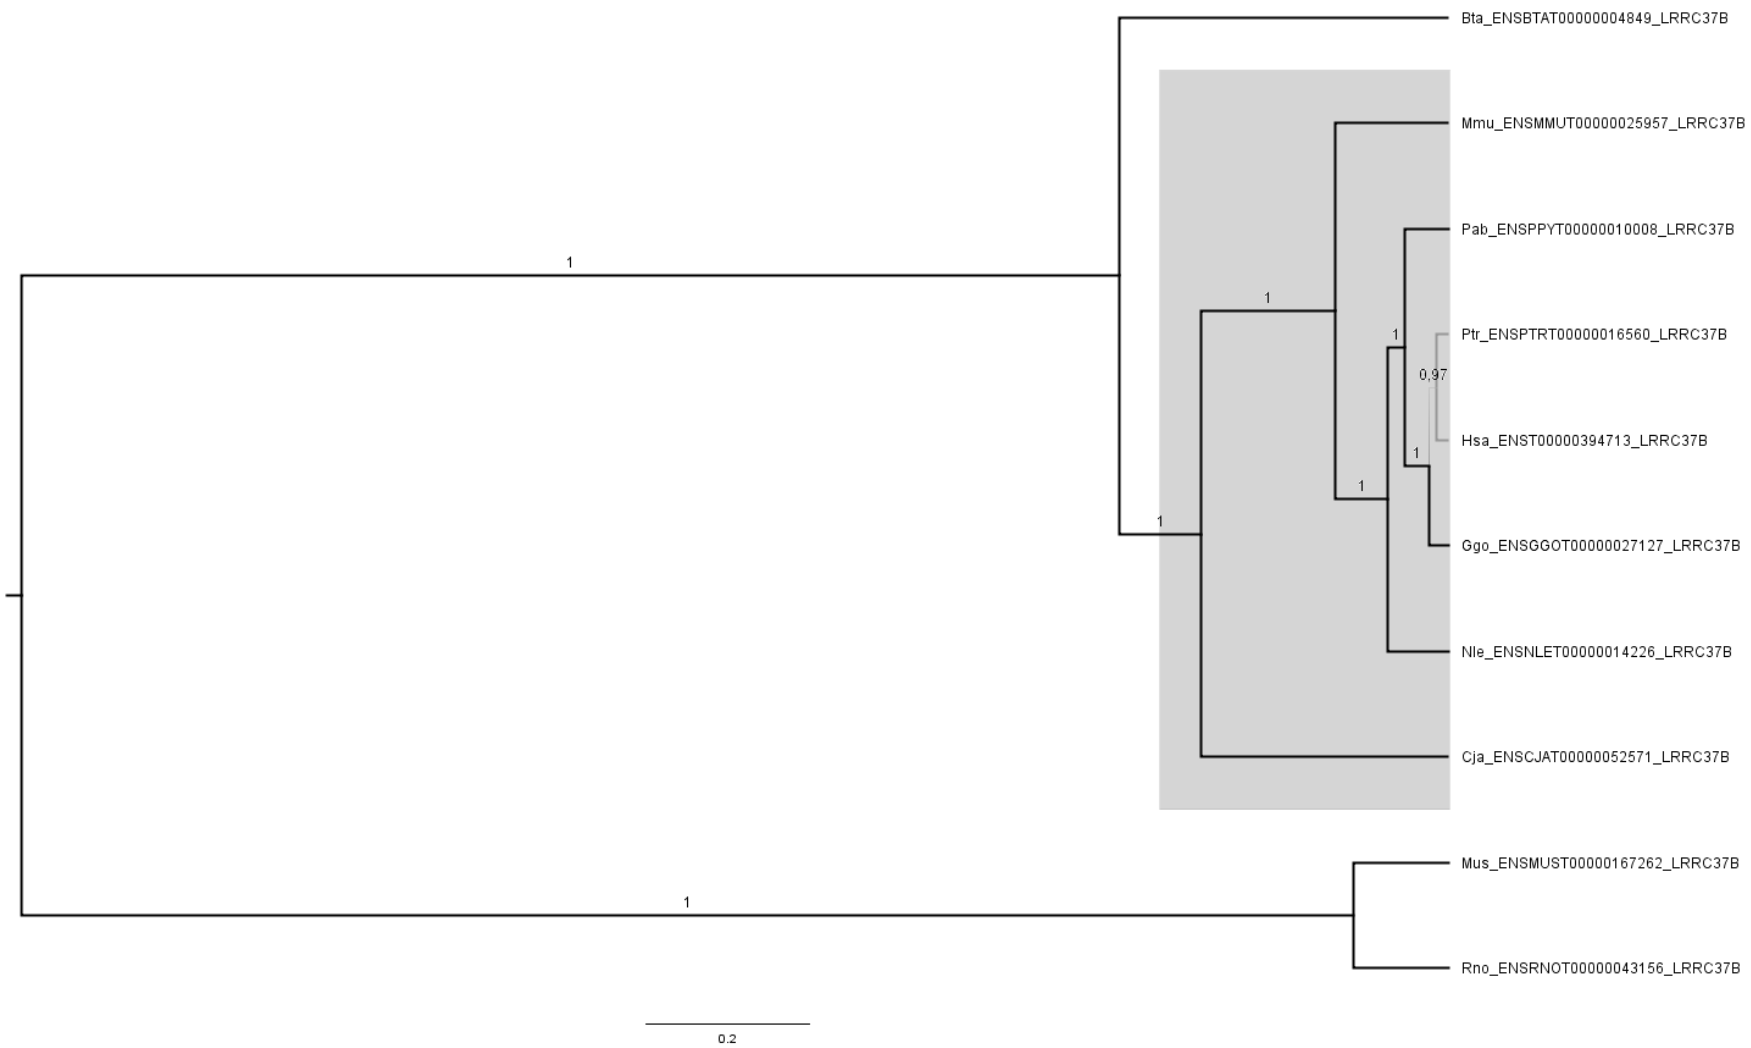

**Supplementary Figure 15. Phylogenetic tree of *LRRC37B* gene reconstructed based on amino acid sequences.**
